# Supplementary material for: Integrating 4 methods to evaluate physical function in patients with cancer (In4M): protocol for a prospective cohort study
Source: PubMed Central journal article supplement (PMC10806877; doi:10.1136/bmjopen-2023-074030), 2024-01-10
Supplement: bmjopen-2023-074030.draft_revisions.pdf [file bmjopen-2023-074030.draft_revisions.pdf]

# BMJ Open

BMJ Open is committed to open peer review. As part of this commitment we make the peer review history of every article we publish publicly available.

When an article is published we post the peer reviewers' comments and the authors' responses online. We also post the versions of the paper that were used during peer review. These are the versions that the peer review comments apply to.

The versions of the paper that follow are the versions that were submitted during the peer review process. They are not the versions of record or the final published versions. They should not be cited or distributed as the published version of this manuscript.

BMJ Open is an open access journal and the full, final, typeset and author-corrected version of record of the manuscript is available on our site with no access controls, subscription charges or pay-per-view fees (<http://bmjopen.bmj.com>).

If you have any questions on BMJ Open's open peer review process please email [info.bmjopen@bmj.com](mailto:info.bmjopen@bmj.com)

# BMJ Open

## Integrating 4 Measures to Evaluate Physical Function in Patients with Cancer (In4M): Protocol for a prospective study

|                               |                                                                                                                                                                                                                                                                                                                                                                                                                                                                                                                                                                                                                                                                                                                                                                                                                                                                                                                                                                                                                                                                                                                                                                                                                                                                                                                                                                                                                                                                                                                                                                                                                                                                                                                                                                                                                   |
|-------------------------------|-------------------------------------------------------------------------------------------------------------------------------------------------------------------------------------------------------------------------------------------------------------------------------------------------------------------------------------------------------------------------------------------------------------------------------------------------------------------------------------------------------------------------------------------------------------------------------------------------------------------------------------------------------------------------------------------------------------------------------------------------------------------------------------------------------------------------------------------------------------------------------------------------------------------------------------------------------------------------------------------------------------------------------------------------------------------------------------------------------------------------------------------------------------------------------------------------------------------------------------------------------------------------------------------------------------------------------------------------------------------------------------------------------------------------------------------------------------------------------------------------------------------------------------------------------------------------------------------------------------------------------------------------------------------------------------------------------------------------------------------------------------------------------------------------------------------|
| Journal:                      | <i>BMJ Open</i>                                                                                                                                                                                                                                                                                                                                                                                                                                                                                                                                                                                                                                                                                                                                                                                                                                                                                                                                                                                                                                                                                                                                                                                                                                                                                                                                                                                                                                                                                                                                                                                                                                                                                                                                                                                                   |
| Manuscript ID                 | bmjopen-2023-074030                                                                                                                                                                                                                                                                                                                                                                                                                                                                                                                                                                                                                                                                                                                                                                                                                                                                                                                                                                                                                                                                                                                                                                                                                                                                                                                                                                                                                                                                                                                                                                                                                                                                                                                                                                                               |
| Article Type:                 | Protocol                                                                                                                                                                                                                                                                                                                                                                                                                                                                                                                                                                                                                                                                                                                                                                                                                                                                                                                                                                                                                                                                                                                                                                                                                                                                                                                                                                                                                                                                                                                                                                                                                                                                                                                                                                                                          |
| Date Submitted by the Author: | 31-Mar-2023                                                                                                                                                                                                                                                                                                                                                                                                                                                                                                                                                                                                                                                                                                                                                                                                                                                                                                                                                                                                                                                                                                                                                                                                                                                                                                                                                                                                                                                                                                                                                                                                                                                                                                                                                                                                       |
| Complete List of Authors:     | <p>Thanarajasingam, Gita ; Mayo Clinic, Division of Hematology<br/> Kluetz, Paul; FDA<br/> Bhatnagar, Vishal; FDA<br/> Brown, Abbie ; Mayo Clinic, Health Education and Content Services<br/> Cathcart-Rake, Elizabeth; Mayo Clinic, Department of Medical Oncology<br/> Diamond, Matthew ; FDA<br/> Faust , Louis; Mayo Clinic, Division of Health Care Delivery Research<br/> Fiero, Mallorie H.; US Food and Drug Administration,<br/> Huntington, Scott; Yale University, Department of internal Medicine; Yale School of Medicine, Yale's Cancer Outcomes, Public Policy, and Effectiveness Research (COPPER) Center<br/> Jeffery, Molly; Mayo Clinic, Division of Health Care Delivery Research and Department of Emergency Medicine; Mayo Clinic, Department of Emergency Medicine<br/> Jones, Lee ; Patient Advocate<br/> Noble, Brie ; Mayo Clinic, Department of Quantitative Health Sciences<br/> Paludo , Jonas; Mayo Clinic, Division of Hematology<br/> Powers , Brad; CancerHacker Lab<br/> Ross, Joseph; Yale School of Medicine, Internal Medicine; Yale School of Medicine, Yale-New Haven Center for Outcomes Research and Evaluation (CORE)<br/> Ritchie, Jessica; Yale School of Medicine, Yale-New Haven Center for Outcomes Research and Evaluation (CORE)<br/> Ruddy, Kathryn; Mayo Clinic, Department of Medical Oncology<br/> Schellhorn, Sarah ; Yale School of Medicine, Department of Internal Medicine; Yale School of Medicine, Yale's Cancer Outcomes, Public Policy, and Effectiveness Research (COPPER) Center<br/> Tarver, Michelle; FDA<br/> Dueck, Amylou; Mayo Clinic, Department of Quantitative Health Sciences<br/> Gross, Cary; Yale School of Medicine; Yale School of Medicine, Yale's Cancer Outcomes, Public Policy, and Effectiveness Research (COPPER) Center</p> |
| Keywords:                     | ONCOLOGY, Patient Reported Outcome Measures, Lymphoma < ONCOLOGY, Breast tumours < ONCOLOGY                                                                                                                                                                                                                                                                                                                                                                                                                                                                                                                                                                                                                                                                                                                                                                                                                                                                                                                                                                                                                                                                                                                                                                                                                                                                                                                                                                                                                                                                                                                                                                                                                                                                                                                       |
|                               |                                                                                                                                                                                                                                                                                                                                                                                                                                                                                                                                                                                                                                                                                                                                                                                                                                                                                                                                                                                                                                                                                                                                                                                                                                                                                                                                                                                                                                                                                                                                                                                                                                                                                                                                                                                                                   |

1  
2  
3  
4  
5  
6  
7  
8  
9  
10  
11  
12  
13  
14  
15  
16  
17  
18  
19  
20  
21  
22  
23  
24  
25  
26  
27  
28  
29  
30  
31  
32  
33  
34  
35  
36  
37  
38  
39  
40  
41  
42  
43  
44  
45  
46  
47  
48  
49  
50  
51  
52  
53  
54  
55  
56  
57  
58  
59  
60

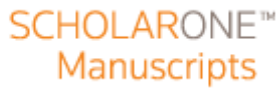

## **Integrating 4 Measures to Evaluate Physical Function in Patients with Cancer (In4M):**

### **Protocol for a prospective study**

Gita Thanarajasingam<sup>1</sup>, Paul G. Kluetz<sup>2</sup>, Vishal Bhatnagar<sup>2</sup>, Abbie Brown<sup>3</sup>, Elizabeth Cathcart-Rake<sup>4</sup>, Matthew Diamond<sup>2</sup>, Louis Faust<sup>5</sup>, Mallorie H. Fiero<sup>2</sup>, Scott F. Huntington<sup>6,7</sup>, Molly Moore Jeffery<sup>5,8</sup>, Lee Jones<sup>9</sup>, Brie N. Noble<sup>10</sup>, Jonas Paludo<sup>1</sup>, Brad Powers<sup>11</sup>, Joseph S. Ross<sup>6,12,13</sup>, Jessica D. Ritchie<sup>12</sup>, Kathryn J. Ruddy<sup>4</sup>, Sarah E. Schellhorn<sup>6,7</sup>, Michelle E. Tarver<sup>2</sup>, Amylou C. Dueck<sup>10</sup>, Cary P. Gross<sup>6,7,12,14</sup>

#### Author affiliations:

<sup>1</sup>Division of Hematology, Mayo Clinic, Rochester, Minnesota, USA

<sup>2</sup>U.S. Food and Drug Administration, Silver Spring, Maryland, USA

<sup>3</sup>Health Education and Content Services, Mayo Clinic, Rochester, Minnesota, USA

<sup>4</sup>Department of Medical Oncology, Mayo Clinic, Rochester, Minnesota, USA

<sup>5</sup>Division of Health Care Delivery Research, Kern Center for the Science of Health Care Delivery, Mayo Clinic, Rochester, Minnesota, USA

<sup>6</sup>Department of Internal Medicine, Yale School of Medicine, New Haven, Connecticut, USA

<sup>7</sup>Yale's Cancer Outcomes, Public Policy, and Effectiveness Research (COPPER) Center, Yale School of Medicine, New Haven, Connecticut, USA

<sup>8</sup>Department of Emergency Medicine, Mayo Clinic, Rochester, Minnesota, USA

<sup>9</sup>Patient advocate, Arlington, Virginia, USA

<sup>10</sup>Department of Quantitative Health Sciences, Mayo Clinic, Phoenix, Arizona, USA

<sup>11</sup>CancerHacker Lab, Boston, Massachusetts, USA

<sup>12</sup>Yale-New Haven Center for Outcomes Research and Evaluation (CORE), New Haven, Connecticut, USA

<sup>13</sup>Department of Health Policy and Management, Yale School of Public Health, New Haven, Connecticut, USA

<sup>14</sup>Department of Chronic Disease Epidemiology, Yale School of Public Health, New Haven, Connecticut, USA

Abstract word count: 248

Body word count: 4139

Figures: 1

Tables: 1

Protocol: March 24, 2023 version 1

Correspondence to:

1  
2  
3  
4  
5  
6  
7  
8  
9  
10  
11  
12  
13  
14  
15  
16  
17  
18  
19  
20  
21  
22  
23  
24  
25  
26  
27  
28  
29  
30  
31  
32  
33  
34  
35  
36  
37  
38  
39  
40  
41  
42  
43  
44  
45  
46  
47  
48  
49  
50  
51  
52  
53  
54  
55  
56  
57  
58  
59  
60

Gita Thanarajasingam, MD  
Division of Hematology  
Mayo Clinic  
200 1<sup>st</sup> Street SW  
Rochester, Minnesota 55905  
Email: [thanarajasingam.gita@mayo.edu](mailto:thanarajasingam.gita@mayo.edu)  
Phone: (507) 284-6400

For peer review only

## **ABSTRACT**

### ***Introduction***

Accurate, patient-centered evaluation of physical function in patients with cancer can provide important information on the functional impacts experienced by patients both from the disease and its treatment. Increasingly, digital health technology is facilitating and providing new ways to measure symptoms and function. There is a need to characterize the longitudinal measurement characteristics of physical function assessments, including clinician-reported physical function (ClinRo), patient-reported physical function (PRO), performance outcome tests (PerfO) and wearable data, to inform regulatory and clinical decision-making in cancer clinical trials and oncology practice.

### ***Methods and analysis***

In this prospective study, we are enrolling 200 English- and/or Spanish-speaking patients with breast cancer or lymphoma seen at Mayo Clinic or Yale University who will receive standard of care intravenous cytotoxic chemotherapy. Physical function assessments will be obtained longitudinally using multiple assessment modalities. Participants will be followed for 9 months using a patient-centered health data aggregating platform that consolidates study questionnaires, electronic health record data, and activity and sleep data from a wearable sensor. Data analysis will focus on understanding variability, sensitivity, and meaningful changes across the included physical function assessments and evaluating their relationship to key clinical outcomes. Additionally, the feasibility of multi-modal physical function data collection in real-world patients with cancer will be assessed, as will patient impressions of the usability and acceptability of the wearable sensor, data aggregation platform, and PROs.

### ***Ethics and dissemination***

1  
2  
3 This study has received approval from IRBs at Mayo Clinic, Yale University, and the U.S. Food  
4 & Drug Administration. Results will be made available to participants, funders, the research  
5  
6  
7  
8 community, and the public.  
9

10  
11  
12 **Registration Details.** The trial registration number for this study is NCT05214144  
13

14  
15 ***Strengths & limitations of this study***  
16

- 17 • This study addresses an important unmet need by characterizing the performance  
18 characteristics of multiple patient-centered physical function measures in patients with  
19 cancer  
20  
21  
22
- 23 • Physical function is an important and undermeasured clinical outcome. Scientifically  
24 rigorous capture and measurement of physical function constitutes a key component of  
25 cancer treatment tolerability assessment both from a regulatory and clinical perspective.  
26  
27  
28
- 29 • This study will include patients with lymphoma or breast cancer receiving a broad range  
30 of cytotoxic chemotherapy regimens. While recruitment will occur at two academic sites,  
31 patients who ultimately receive treatment at local community sites will be included.  
32  
33  
34
- 35 • A patient-centered health data aggregating platform facilitates the delivery of patient-  
36 reported outcome measures and collection of wearable data to researchers, while reducing  
37 patient burden compared to traditional patient-generated data collection and aggregation  
38 methods  
39  
40  
41
- 42 • Heterogeneity in patient willingness or comfort engaging with mobile products including  
43 smartphones and wearables, enrollment primarily at large academic centers, and the  
44 modest sample size are potential limitations to the external validity of the study  
45  
46  
47  
48  
49  
50  
51  
52  
53  
54  
55  
56  
57  
58  
59  
60

## MAIN MANUSCRIPT

### INTRODUCTION

Cancer clinical trials have long emphasized important metrics of tumor response and survival rates to evaluate the benefit of cancer trials. However, there has been increasing recognition of the importance of systematically assessing how patients feel and function – tolerability – while on treatment.<sup>1</sup> Disease-related symptoms, physical function, and toxicity (i.e. side effects from treatment) are core outcomes that have been identified by the United States Food & Drug Administration to inform the safety, tolerability and efficacy of an investigational cancer therapy<sup>2,3</sup>.

Physical function (PF) is defined as the ability to carry out day-to-day activities that require physical effort<sup>4</sup>. Symptoms related to a patient's underlying cancer as well as treatment-related toxicity can impact PF. PF can be assessed using multiple complementary approaches. These include clinician- or investigator-reports (e.g. Eastern Cooperative Oncology Group [ECOG] performance status [PS]<sup>5</sup>), patient-reported outcome measures (PROs; e.g., questionnaires administered to patients that assess their physical functioning), performance outcome measures<sup>6</sup> involving measurement observation of a patient's function (e.g. 6-minute walk test [6MWT], Timed Up and Go [TUG] test), and physiologic and functional data collected using digital health technologies such as wearable sensors. Given that there are multiple approaches to assessing PF, quantitative data are needed to understand differences in measurement characteristics between these distinct data sources, including variability over time, agreement among measures, sensitivity to changes, and meaningful levels of change.



1  
2  
3 ***Historical approach to evaluating physical function in cancer clinical trials: clinician-***  
4 ***reported assessment (ClinRo)***  
5  
6

7  
8  
9 The widely accepted method for recording a patient's overall functional status in most cancer  
10 clinical trials has historically been clinician- or investigator-reported PS using scales such as the  
11 Karnofsky performance status (KPS)<sup>7</sup> and its derivative, the ECOG PS<sup>5</sup>. These tools have  
12 become a ubiquitous, international standard in hematology/oncology practice and research.  
13 While the simplicity of the PS is attractive, it is also a drawback, as it lacks granularity, which  
14 becomes particularly relevant in the setting of patients at ECOG PS 2-3 and clinical trial  
15 eligibility. Many trial eligibility criteria exclude patients with ECOG PS  $\geq 2$ , thus leaving the  
16 subjective judgement of an oncologist as the main factor determinant of whether a patient can  
17 receive what is often a highly desirable therapy on study, or not<sup>8</sup>. This lack of granularity may  
18 also impact its sensitivity as a longitudinal outcome measure of changes in PF, reducing the  
19 utility of this measure, originally developed as a prognostic tool, when used as a clinical trial  
20 outcome assessed over time. Additional limitations to the ECOG PS as a longitudinal measure  
21 of physical functioning are that the score is clinician-assessed, rather than directly reflecting the  
22 patient experience<sup>9</sup>, and is rarely assessed post-baseline in most cancer trials.  
23  
24  
25  
26  
27  
28  
29  
30  
31  
32  
33  
34  
35  
36  
37  
38  
39  
40  
41

42 ***Novel and more comprehensive approaches to measuring PF which complement ClinRo***

43 ***Patient-reported outcomes (PROs)***  
44

45  
46  
47  
48 While patient health records and provider assessments are invaluable resources for clinical  
49 care and research, the patient's voice is most often absent. PROs are reports of the status of the  
50 patient's health that come directly from the patient, without interpretation of the patient's  
51 response by a clinician or caregiver<sup>10</sup>. PROs are an assessment method that can be used to  
52  
53  
54  
55  
56  
57  
58  
59  
60

1  
2  
3 directly capture many aspects of a patients' health, from individual symptoms to functional  
4 domains such as physical-, emotional-, cognitive, and social function, to the broad multi-domain  
5 concept of health-related quality of life (HRQOL). Only patients can tell us how their treatments  
6 affect their well-being, as every patient has different goals, values, and preferences. Despite  
7 advances in cancer care and delivery, many patients with cancer experience substantial  
8 symptoms from disease, side effects from treatment, and functional decline that negatively affect  
9 their HRQOL. Clinicians often miss or underreport symptomatic adverse events (AE)  
10 experienced by patients that can lead to physical, psychological, and other toxicities going  
11 unrecognized<sup>11 12</sup>. The systematic incorporation of PRO assessment to measure symptoms and  
12 function that affect patients' HRQOL in cancer clinical trials is now recognized as critical to  
13 complement standard tumor, survival, and clinician-reported safety data by patients, clinicians,  
14 industry, academics, and regulators.<sup>13-15</sup>

15  
16  
17 Some of the more commonly used PRO measurement systems used in cancer research  
18 include the European Organisation for Research and Treatment of Cancer (EORTC)  
19 questionnaires<sup>16</sup>, Patient-Reported Outcomes Measurement Information System (PROMIS)  
20 questionnaires<sup>17</sup>, and the Functional Assessment of Chronic Illness Therapy (FACIT)  
21 questionnaires<sup>18</sup>. Several of these tools include items or subscales that assess physical  
22 functioning. The Patient-Reported Outcomes version of the Common Terminology Criteria for  
23 Adverse Events (PRO-CTCAE)<sup>19</sup> is a library of important symptomatic adverse events that can  
24 quantify symptomatic toxicities from the patient perspective and can inform causative symptoms  
25 that may impact physical functioning. Additionally, prior studies have demonstrated the benefit  
26 of patients (in addition to clinicians) directly reporting their own ECOG PS<sup>20</sup>, and patient-  
27 friendly versions of the ECOG PS are available<sup>21-23</sup>.

1  
2  
3 The Patient Global Impression scales (“of change” abbreviated as PGI-C; or “of severity”  
4 abbreviated as PGI-S) are single item questions used to evaluate the patient’s perception of  
5 change in PF and severity.<sup>24</sup> These questions are often used to assess meaningful change in PRO  
6 scores and other functional measures. There are also questions that are disease-specific, and  
7 tools designed to focus more specifically on a particular domain such as physical function.<sup>25</sup>  
8  
9  
10  
11  
12  
13

#### 14 15 16 *Performance outcome (PerfO) measures*

17 PerfO measures are defined as a measurement based on standardized task(s) actively  
18 undertaken by a patient according to a set of instructions. A PerfO assessment may be  
19 administered by an appropriately trained individual or completed by the patient independently.<sup>6</sup>  
20 There are a variety of validated PerfO measures that can be used to more objectively measure a  
21 patient’s physical PS, including the TUG test, the Sit-Rise test, the Short Physical Performance  
22 Battery, gait speed, and grip strength.<sup>26 27</sup> The TUG has been used to predict falls in a cohort of  
23 geriatric patients with cancer, but the others have not been validated in broader cancer cohorts.<sup>28</sup>  
24 As these tools are primarily used in geriatric populations, they may not be as discriminating with  
25 younger patients who have better baseline physical fitness.  
26  
27  
28  
29  
30  
31  
32  
33  
34  
35  
36  
37  
38  
39

40 On the other hand, the 6MWT is a comprehensive measure of exercise capacity suitable for  
41 a broad age range. The 6MWT encompasses components of mobility, endurance, and functional  
42 capacity.<sup>29-31</sup> It is relatively straightforward to administer, requires little expertise or training for  
43 the patient, and involves minimal equipment. The 6MWT has been used in patients undergoing  
44 cancer treatment as well as cancer survivors<sup>32 33</sup> and normative values for patients with  
45 hematologic malignancies have been published. In this study, the standard, validated 6MWT has  
46 been selected as the PerfO of interest.  
47  
48  
49  
50  
51  
52  
53  
54  
55  
56  
57  
58  
59  
60

### *Wearable technologies*

Wearable products have steadily advanced over the last several years with rapidly evolving sensor technology to measure human movement, such as accelerometers, magnetometers, and gyroscopes.<sup>34</sup> Commercially available, consumer-grade wearables capable of tracking movement have become ubiquitous to the general public in recent years.<sup>35</sup> These products can further inform our measurement and understanding of PF by allowing passive monitoring of physical activity in the real world setting. Wearable technology mitigates some of the limitations of self-reported data (e.g., avoiding recall bias), and the narrow validity of data generated in tightly controlled research lab environments.<sup>34 36</sup>

Wearables have been used to assess physical rehabilitation of patients with disabilities and elderly or hospitalized patients.<sup>37-40</sup> Both capacity (what a patient can do, such as maximal gait speed) and performance (what a patient does, such as total steps per day) have been measured using wearables when assessing changes in PF.<sup>35</sup> A recent study demonstrated a correlation of heart rate variability measured through a wearable product with PF assessed using the Short Physical Performance Battery scores, TUG scores, and self-reported PF (SF-36 physical composite scores).<sup>41</sup> The correlation of average daily steps with the 6MWT, another established capacity assessment, was also reported by a recent study.<sup>42</sup>

Fitbit activity tracking products were selected for this study as they have demonstrated acceptable accuracy for heart rate, step count and moderate to vigorous physical activities (MVPA) when compared to research-grade tracking products.<sup>43-45</sup> Additionally, they are widely available and familiar to consumers.

### ***Unmet needs in the evaluation of physical function in cancer patients***

There is an unmet need to better characterize the measurement characteristics of ClinRo, PRO, PerfO and wearable data to inform selection of measures to meet individual cancer clinical trial objectives. For most therapeutic trials, it may be sufficient to select a single measure suitable across a wide variety of trial contexts to foster standardization, while comparative tolerability trials may use several measures to increase confidence in findings. In all cases, a firm scientific understanding of measurement characteristics including variability, sensitivity, and meaningful change across all modalities would advance our ability to make science-driven trial design decisions and best inform regulatory and clinical decision-making. Operational aspects including ease of use and adherence are also critical to identify methods to reduce missing data- a key challenge to interpreting PF results regardless of assessment modality.

Few studies have demonstrated the logistical feasibility, sensitivity, and complementarity of different PF measurement modalities in the cancer treatment context. There has been no clear identification of meaningful levels of change for these measures either with respect to patient experience or in correlation with adverse event or hospitalization rates. Such data would inform potential use of PROs and digital hardware in the design of tolerability endpoints for regulatory review in cancer clinical trials in all phases of medical product (i.e., drug, device, and biologics) development.

In this prospective study, we will evaluate PF in patients with cancer undergoing routine treatment. We will collect PF data across four assessment modalities in a population of patients with solid tumors and hematologic malignancies receiving cytotoxic chemotherapy with standard clinical follow up and care.

### ***Study Aims***

1  
2  
3 The purpose of this study is to integrate four PF measures (ClinRo, PRO, PerfO and wearable  
4 data) in a prospective cohort of patients receiving chemotherapy for breast cancer or lymphoma.  
5  
6 Using a digital health-based patient-centered data aggregation platform, Hugo Health, we aim to  
7  
8 collect and compare PF trajectories and establish measurement characteristics for the different  
9  
10 assessment modalities of PF.  
11  
12  
13

14 There are three main study aims:

- 15  
16  
17 1) To measure PF using ClinRo, PRO, PerfO and wearable data. This includes  
18  
19 characterizing feasibility and assessment challenges by comparing levels of missing data  
20  
21 and reasons for missingness across the PF modalities and report on trajectories of  
22  
23 function as ascertained by the four PF modalities.  
24  
25  
26
- 27  
28 2) To explore associations between various sources of PF data and determine meaningful  
29  
30 change thresholds. This includes assessing measurement characteristics of the different  
31  
32 modalities, including sensitivity to change and identification of meaningful change  
33  
34 thresholds; comparing changes within and between modalities; and exploring  
35  
36 associations between changes in the PF modalities and subsequent clinical outcomes,  
37  
38 such as patient-reported AEs, other patient-reported domains of HRQOL, acute care  
39  
40 usage, and chemotherapy dose delay/reduction.  
41  
42  
43
- 44  
45 3) To assess patient acceptability and experience using the different PF assessment  
46  
47 modalities, via the use of an exit questionnaire, to understand burden and usability of  
48  
49 electronic PROs and wearable data collection from the patient perspective.  
50  
51  
52

## 53 **METHODS**

54  
55  
56  
57  
58  
59  
60

1  
2  
3 In this prospective study, we are collecting PF data across the four different assessment  
4 modalities in a population of patients with breast cancer or lymphoma receiving routine-  
5 anticancer therapy including a cytotoxic chemotherapy. We plan to follow patients prospectively  
6 for 9 months, tracking clinician and patient self-report of physical functioning, PerfOs, and  
7 wearable data using a patient-centered health data sharing platform – Hugo Health – that will  
8 consolidate data from electronic health records (EHR), patient surveys, and wearable data (See  
9 Figure 1, Study Schema). Patients use their personal smartphone or other web-connected mobile  
10 product to answer questionnaires about PF, symptoms and adverse effects. Information from the  
11 EHR is collected to record baseline clinical features, clinician-reported performance status,  
12 treatment plans, and outcomes including acute care usage (emergency department visits,  
13 hospitalizations), and chemotherapy dose reductions, delays or discontinuations.  
14  
15  
16  
17  
18  
19  
20  
21  
22  
23  
24  
25  
26  
27  
28

29 The study is based at Mayo Clinic (Minnesota) and Yale University. Participants are  
30 recruited both at community and academic hospitals, as well as clinics affiliated with these sites.  
31  
32 Participants can be treated after recruitment at a local community site and followed remotely  
33 after study consent and enrollment is obtained at the primary site. Informational flyers are  
34 placed in waiting rooms of breast cancer and lymphoma clinic practices at both primary sites.  
35  
36 Charts of potential study candidates are reviewed by clinical investigators, and if potentially  
37 eligible, patients are approached about and consented for the study by the study research  
38 assistants. Each site will enroll 100 patients. Complete inclusion and exclusion criteria are in  
39 Appendix 1.  
40  
41  
42  
43  
44  
45  
46  
47  
48  
49  
50

### 51 ***Measures and Data Collection***

52  
53  
54  
55  
56  
57  
58  
59  
60

1  
2  
3 A detailed description of Hugo Health, the electronic health data aggregating technology used to  
4 administer PRO questionnaires, collect patient electronic health record portal data, and aggregate  
5 wearable data in this study, has been published previously.<sup>46 47</sup> All of the data and records  
6 described below and generated during this study are kept confidential in accordance with  
7 institutional policies and the Health Insurance Portability and Accountability Act (HIPAA) on  
8 subject privacy.  
9

### 18 *Clinician-Reported Performance Status (ClinRo) and Performance Outcomes (PerfO)*

21 Clinician-reported performance status is recorded from the medical record into a REDcap form  
22 by research assistants every 3 months. The 6MWT is performed once at baseline (prior to start  
23 of chemotherapy) and at 3 months for participants treated at Mayo Clinic and Yale primary sites.  
24 Participants receiving care at another site will not have an additional 6MWT observation.  
25  
26  
27  
28  
29

### 31 *Patient-Reported Outcomes (PRO)*

34 Questionnaires are sent by Hugo to patients throughout the 9-month follow-up period  
35 (Supplementary Table 1). To inform our measurement approach, we engaged three patient  
36 advocate co-investigators who reviewed the schedule of assessments to minimize participant  
37 burden. PROs assessing PF include the PROMIS version 2.0 physical function 8c short form, PF  
38 questions from the EORTC QLQ-F17 instrument, a patient-adapted version of the ECOG PS  
39 (PRO-ECOG), and the PGI-C/PGI-S items pertaining to PF. Additional PROs that capture  
40 global assessments of quality of life and well-being (functional and QOL domains of the EORTC  
41 QLQ-F17 and selected items from the PRO-CTCAE, FACIT GP5) are used to assess the  
42 correlation of PF data with symptomatic toxicities, patient-reported AEs, and other domains of  
43 HRQOL. Hugo sends automated reminders if patients do not complete the weekly survey after  
44  
45  
46  
47  
48  
49  
50  
51  
52  
53  
54  
55  
56  
57  
58  
59  
60



1  
2  
3 48 hours or the monthly survey after one week. Additionally, at key timepoints, research  
4  
5 assistants call patients if questionnaires have not been completed after 5 days for weekly  
6  
7 questionnaires or after 2 weeks and 2 days for the monthly questionnaires.  
8  
9

### 10 11 *Wearable data*

12  
13 A Fitbit model with built-in GPS, the Fitbit Inspire, is used in this study. Multiple data  
14  
15 parameters are recorded from the lead-in time point to the completion of month 9 of follow up.  
16  
17 The lead-in time, for baseline data collection prior to initiation of cancer-directed therapy, was  
18  
19 pragmatically derived to be at least 24 hours. Fitbit data are automatically uploaded from the  
20  
21 wearable to Fitbit's servers when the Bluetooth feature on the patient's wearable is turned on.  
22  
23 Hugo downloads that data through the Fitbit API regularly and links it to the other participant  
24  
25 data. All wearable data is collected and stored via Hugo.  
26  
27

28  
29 Patients are instructed to (1) wear the Fitbit as much as possible during the day and night,  
30  
31 limiting non-wear time to recharging periods (approximately 1-2 hours every 3 days) and (2)  
32  
33 synchronize (upload) the Fitbit data from the wearable to Fitbit's servers every 3 days using the  
34  
35 Fitbit smartphone application. Reminders to synchronize Fitbit data are delivered by Hugo to  
36  
37 study participants on a weekly basis. Additionally, Fitbit data are reviewed for completeness by  
38  
39 the study team weekly and patients whose data has not been received are contacted by research  
40  
41 assistants.  
42  
43  
44

45  
46 Predefined parameters evaluating both capacity and performance measurements of PF from  
47  
48 three domains (steps/distance, heart rate, and activity level) will be used for comparison with the  
49  
50 other PF assessment modalities. Additional metrics of interest derived from the raw data  
51  
52 parameters or obtained directly from Fitbit will be considered. These additional metrics may  
53  
54  
55  
56  
57  
58  
59  
60

1  
2  
3 include distance walked per day, sleep duration per day, heart rate variability, sleep cycle  
4  
5 duration, etc.  
6

### 7 *Analysis Plan*

8  
9  
10 Specific Aim 1: In order to characterize assessment challenges, completion rates will be  
11  
12 computed and reasons for missing data will be described. For each PF metric, the completion  
13  
14 rate will be computed at applicable time points using (1) a fixed denominator method using all  
15  
16 patients ever enrolled, and (2) a variable denominator method using the number of active patients  
17  
18 at each time point. For the variable denominator approach, at each timepoint, active participants  
19  
20 are those who have not died and have not withdrawn from study participation. Intercurrent  
21  
22 events including reason for study withdrawal, disease progression, and death will be summarized  
23  
24 in analysis.  
25  
26  
27

28  
29 To describe distributions of PF responses over time, the trajectory of each PF metric will be  
30  
31 graphically explored using stream (spaghetti) plots and mean plots. Mean plots will employ raw  
32  
33 means as well as estimated means from a general linear mixed modeling at each time point.  
34  
35 Estimation will include group means and group mean changes from baseline.  
36  
37  
38

39 Specific Aim 2: To identify measurement characteristics of each PF metric, standard  
40  
41 psychometric analyses investigating sensitivity to change, and meaningful change thresholds will  
42  
43 be carried out. These analyses will employ both anchor-based and distribution-based methods.  
44  
45 The primary anchor will be PGI-C and the key secondary anchor will be PGI-S.  
46  
47  
48

49 Distribution-based analyses for each PF metric will include the mean, standard deviation,  
50  
51 median, first quartile, third quartile, minimum, and maximum. Effect sizes representing small,  
52  
53  
54  
55  
56  
57  
58  
59

1  
2  
3 moderate, and large effects will be computed as 0.2, 0.5, and 0.8 times the baseline standard  
4  
5 deviation.  
6  
7

8 Anchor-based analyses will estimate the mean change for each PF metric over time  
9  
10 according to how patients respond to the PGI-C and PGI-S items. Mean change at each post-  
11  
12 baseline timepoint will be described using the mean and standard deviation within strata of  
13  
14 patients grouped by their status change (those reporting worsening status; no change in status;  
15  
16 and improved status) and their current limitations in PF (no limitations, mild or moderate  
17  
18 limitations, and severe limitations). Additionally, the standardized response mean (SRM) will be  
19  
20 computed as the mean change score divided by the standard deviation of the change scores  
21  
22 within each change category (worsening vs. no change vs. improvement) or severity category  
23  
24 (normal vs. mild/moderate vs. severe). Values greater than 0.8 will be considered large and  
25  
26 values between 0.5 and 0.8 will be considered moderate. Additionally, Spearman correlations  
27  
28 between the change in each PF metric and the change in other anchors (e.g., physician-reported  
29  
30 and patient-reported ECOG PS, patient-reported role function, global health status/QOL, and  
31  
32 HRQOL via the EORTC QLQ-C17; PRO-CTCAE symptomatic adverse event grades; and  
33  
34 FACIT GP5) will be computed.  
35  
36  
37  
38  
39  
40

41 The relationship between change in PF metrics and PGI-C and PGI-S items will be  
42  
43 investigated using general linear mixed models. Mean change from baseline with 95%  
44  
45 confidence intervals will be computed for each PF metric based on mixed modeling. Mixed  
46  
47 models will include all PF metrics as outcomes and time as a categorical variable. Additional  
48  
49 patient or design characteristics will be incorporated as baseline covariates. Composite  
50  
51 covariance will initially be used, with the final covariance structure selected based on  
52  
53 minimization of the Akaike information criterion. All patients who consent for participation in  
54  
55  
56  
57  
58  
59  
60

1  
2  
3 this study and complete at least one PF metric will be included in statistical analysis. In the  
4  
5 primary analysis, all observations available will be used.  
6  
7

8 We will conduct secondary analyses, assessing the association between baseline patient  
9  
10 characteristics and baseline PF metrics using Spearman correlations and longitudinal PF metrics  
11  
12 using statistical modeling. Key baseline patient characteristics that will be explored as feasible  
13  
14 based on the distribution of the characteristics observed in the sample will include. cancer cohort  
15  
16 (breast vs. lymphoma); age (<65 vs. ≥65 years); physician-reported ECOG PS; patient-reported  
17  
18 ECOG PS; patient-reported role function, global health status/QOL, and HRQOL via the  
19  
20 EORTC QLQ-C17; PRO-CTCAE symptomatic adverse event grades; and FACIT GP5.  
21  
22 Association between longitudinal patient characteristics (patient-reported ECOG PS; patient-  
23  
24 reported role function, global health status/QOL, and HRQOL via the EORTC QLQ-C17; PRO-  
25  
26 CTCAE symptomatic adverse event grades; and FACIT GP5) and longitudinal PF metrics will  
27  
28 be explored using Spearman correlations at successive time points as well as statistical modeling  
29  
30 (bivariate linear mixed modeling).  
31  
32  
33  
34  
35  
36

37 Specific Aim 3: Statistical analysis will be primarily descriptive for the exit questionnaire  
38  
39 data. Continuous outcomes will be summarized using means, standard deviations, medians,  
40  
41 minimums, and maximums. Categorical outcomes will be summarized using frequencies and  
42  
43 relative frequencies.  
44  
45  
46

47 Power considerations: Our targeted sample enrollment is 200 patients, which we expect will  
48  
49 allow the team to have data available for a given PF metric at early post-baseline timepoints (at  
50  
51 least the first 3 months) for at least 170 patients. Based on a prior study evaluating association  
52  
53 between PF as measured by the QLQ-C17 and a PGI-C item assessing physical condition<sup>19</sup>, we  
54  
55  
56  
57  
58  
59  
60

1  
2  
3 anticipate 25% of patients to report worsening and the mean change in PF among these patients  
4  
5 to be -8.2 points. The remaining 75% of patients reporting no change or improvement had a  
6  
7 mean change in PF of 0.9 points (pooled standard deviation 15.0). Thus, with a sample size of  
8  
9 170 patients, this study has 92% power to detect a similar change as the prior study using a t-test  
10  
11 comparison with a two-sided alpha of 0.05. Statistical analysis will employ a modeling approach  
12  
13 across all time points and thus power estimation based on a single time point can be considered  
14  
15 conservative.  
16  
17  
18  
19

20 **Missing data** Missing data from patient questionnaires will be handled in a number of ways.  
21  
22 Missing items within a summary or scale score will be handled according to each questionnaire's  
23  
24 published scoring algorithms. When summary or scale score data are missing, baseline  
25  
26 patient/disease characteristics will be compared between patients who do and do not provide data  
27  
28 for a given analysis and patterns of missing data will be graphically explored. All analyses will  
29  
30 first be completed using all available data, then by integrating missing categories for categorical  
31  
32 data and analyses completed using multiple imputation via chained equations (20 or more for  
33  
34 each analysis), and finally using pattern mixture models for longitudinal analyses. Output from  
35  
36 all analyses will be tabulated and descriptively compared to assess the degree to which missing  
37  
38 data impacts study results.  
39  
40  
41  
42  
43

44 For all statistical analyses, p-values <0.05 will be considered statistically significant;  
45  
46 however, interpretation will take into consideration that type I error is not strictly controlled  
47  
48 across all planned analyses. For interpreting the clinical significance of effects, 0.2, 0.5, and 0.8  
49  
50 standard deviation (SD) effects will be considered as small, moderate, and large.  
51  
52  
53

#### 54 ***Data collection and management***

55  
56  
57  
58  
59  
60

1  
2  
3 The Hugo platform will aggregate data from the EHR, PROs and wearables. At study  
4 enrollment, patients provide Hugo access to their health portals by authenticating themselves  
5 using their username and password. PerfO and clinician-reported ECOG will be among data  
6 collected by the research assistant and entered into a secure REDCap database. Additionally,  
7 clinical co-investigators will review the medical records of each patient directly for more  
8 granular information on tolerability parameters, such as reasons for hospitalizations or dose  
9 reductions, and these data are entered into the study REDCap database by the research assistant.  
10  
11  
12  
13  
14  
15  
16  
17  
18  
19

### 20 *Patient involvement*

21  
22 Three patient-advocate co-investigators provided input on the design of the study, the  
23 selection of PRO survey items, and timing of scheduled assessments. They also co-created a  
24 “study welcome letter” to describe in patient-tailored language the purpose of the study, and they  
25 have participated in the writing and review of this manuscript. Patient advocates were not  
26 involved in the conduct of the study.  
27  
28  
29  
30  
31  
32  
33  
34  
35

### 36 *Study limitations*

37  
38 Although patients on this study can receive their cancer treatment at primary or local sites  
39 as part of this clinical study, recruitment is limited to patients seen at least once at Mayo Clinic  
40 or Yale clinical sites, limiting participation to patients who have the physical and financial ability  
41 to access these tertiary cancer care centers. Most participants receive treatment at the primary  
42 sites and may not be representative of a larger community oncology practice. We do not offer  
43 patients a smartphone or other web-connected product if they do not have one, which may limit  
44 participation, though smartphone adoption is high at 85% of American adults, including a  
45 majority of those with low income and those living in rural areas, with minimal gaps by race and  
46  
47  
48  
49  
50  
51  
52  
53  
54  
55  
56  
57  
58  
59  
60

1  
2  
3 ethnicity.<sup>48</sup> Some patients who already use a non-Fitbit wearable product or are apprehensive of  
4  
5 wearable data collection may decline participation. Lastly, we do not have formalized  
6  
7 technology support for patients over and above the research assistants in this study, which may  
8  
9 limit our ability to swiftly address technical issues related to Hugo or Fitbit.  
10  
11  
12  
13

### 14 ***Ethics and Dissemination***

15  
16 Institutional review board (IRB) approval was secured at Mayo Clinic, Yale University  
17  
18 and the U.S. Food & Drug Administration. Any protocol modifications will be submitted for  
19  
20 IRB approval prior to implementation, and all trial registration details will be updated  
21  
22 accordingly. Study results will be disseminated through publications in general, and specialty  
23  
24 medical journals and conferences.  
25  
26  
27  
28  
29  
30

### 31 ***Study Update***

32  
33 At the time of this publication, all sites have obtained local IRB approval and are enrolling  
34  
35 participants. The COVID-19 pandemic delayed study activation at both sites; enrollment in this  
36  
37 study began in January 2022. 146 participants have been enrolled at the time of this manuscript  
38  
39 submission.  
40  
41  
42  
43  
44

### 45 ***Author Contributions***

46  
47 Conception or design of the work: PGK, GT, CPG, VB, MMJ, MD, MT, JSR, JDR, AB, LJ, BP,  
48  
49 ACD, KJR.

50  
51 Planning for acquisition, analysis or interpretation of data: MD, LF, BNN, JDR, MF, ACD.

52  
53 Screening, enrollment and health record review: GT, ECR, SH, JP, KJR, SES, CPG.  
54  
55  
56  
57  
58  
59  
60

1  
2  
3 Drafting the work: GT, CPG.  
4

5 Revising the work critically for important intellectual content: All authors  
6

7  
8 Final approval of the version to be published: All authors.  
9

10 Agreement to be accountable for all aspects of the work in ensuring that questions related to the  
11 accuracy or integrity of any part of the work are appropriately investigated and resolved: GT and  
12  
13 CPG.  
14  
15

16  
17 **Funding statement:**  
18

19 This work was supported by the Food and Drug Administration (FDA) of the U.S. Department of  
20 Health and Human Services (HHS) as part of a financial assistance award [U01FD005938]  
21 totaling \$2,665,476 with 100 percent funded by FDA]/HHS. The contents are those of the  
22 author(s) and do not necessarily represent the official views of, nor an endorsement, by  
23  
24 FDA/HHS, or the U.S. Government.  
25  
26  
27  
28  
29

30  
31 **Competing interests**  
32

33 Dr. Thanarajasingam has received research funding from the from the Food and Drug  
34 Administration for the Yale-Mayo Clinic Center of Excellence in Regulatory Science and  
35 Innovation (CERSI) (U01FD005938) that directly supports this work. She also receives grant  
36 funding from the National Cancer Institute (NCI) U01 Tolerability Consortium.  
37  
38  
39  
40  
41  
42  
43

44 Dr. Gross has received research funding from the NCCN Foundation (Astra-Zeneca) and  
45 Genentech, as well as funding from Johnson and Johnson to help devise and implement new  
46 approaches to sharing clinical trial data.  
47  
48  
49  
50  
51  
52  
53  
54  
55  
56  
57  
58  
59  
60



1  
2  
3 Over the past three years, Dr. Jeffery reports grant funding from the US Food and Drug  
4 Administration, National Institutes on Drug Abuse, Centers for Disease Control and Prevention,  
5 Agency for Healthcare Research and Quality, American Cancer Society, and the National Center  
6 for Advancing Translational Sciences.  
7  
8  
9  
10  
11  
12

13  
14 Dr. Ross currently receives research support through Yale University from Johnson and Johnson  
15 to develop methods of clinical trial data sharing, from the Food and Drug Administration for the  
16 Yale-Mayo Clinic Center of Excellence in Regulatory Science and Innovation (CERSI)  
17 (U01FD005938), from the Medical Devices Innovation Consortium as part of the National  
18 Evaluation System for Health Technology (NEST), from the Agency for Healthcare Research  
19 and Quality (R01HS022882), from the National Heart, Lung and Blood Institute of the National  
20 Institutes of Health (NIH) (R01HS025164, R01HL144644), and from Arnold Ventures for the  
21 Collaboration for Regulatory Rigor, Integrity, and Transparency (CRRIT); in addition, Dr. Ross  
22 is an expert witness at the request of Relator's attorneys, the Greene Law Firm, in a qui tam suit  
23 alleging violations of the False Claims Act and Anti-Kickback Statute against Biogen Inc.  
24  
25  
26  
27  
28  
29  
30  
31  
32  
33  
34  
35  
36  
37  
38  
39

40 Ms. Ritchie currently receives research support through Yale University from Johnson &  
41 Johnson to develop methods of clinical trial data sharing and from the US Food and Drug  
42 Administration for the Yale-Mayo Clinic Center of Excellence in Regulatory Science and  
43 Innovation (CERSI) (U01FD005938).  
44  
45  
46  
47  
48  
49  
50  
51  
52  
53  
54  
55  
56  
57  
58  
59  
60

1  
2  
3 Dr. Huntington has received consulting fees outside of this work from Janssen, Genentech,  
4  
5 AbbVie, Flatiron Health, BeiGene, AstraZeneca, ADC Therapeutics, Epizyme, Merck, Seattle  
6  
7 Genetics, TG Therapeutics, Tyme, Pharmacyclics, SeaGen, and Arvinas.  
8  
9

10  
11  
12 Dr. Schellhorn has received consulting fees from Eisai, Celgene, SeaGen, and Cardinal Health.  
13  
14 She has previously received research funding to her institution from Genetech and Pfizer.  
15  
16

17  
18  
19 All other authors have no relevant conflicts of interest to disclose.  
20  
21

## 22 23 24 25 26 27 28 29 30 31 32 33 34 35 36 37 38 39 40 41 42 43 44 45 46 47 48 49 50 51 52 53 54 55 56 57 58 59 60

### References

1. Basch E, Campbell A, Hudgens S, et al. Broadening the definition of tolerability in cancer clinical trials to better measure the patient experience (Friends of Cancer Research White Paper) Friends of Cancer Research White Paper, 2018.
2. Kluetz PG, Chingos DT, Basch EM, et al. Patient-Reported Outcomes in Cancer Clinical Trials: Measuring Symptomatic Adverse Events With the National Cancer Institute's Patient-Reported Outcomes Version of the Common Terminology Criteria for Adverse Events (PRO-CTCAE). *Am Soc Clin Oncol Educ Book* 2016;35:67-73. doi: 10.14694/EDBK\_15951410.1200/EDBK\_159514
3. Kluetz PG, Slagle A, Papadopoulos EJ, et al. Focusing on Core Patient-Reported Outcomes in Cancer Clinical Trials: Symptomatic Adverse Events, Physical Function, and Disease-Related Symptoms. *Clinical Cancer Research* 2016;22(7):1553-58. doi: 10.1158/1078-0432.ccr-15-2035
4. Donovan KA, Donovan HS, Cella D, et al. Recommended patient-reported core set of symptoms and quality-of-life domains to measure in ovarian cancer treatment trials. *J Natl Cancer Inst* 2014;106(7) doi: 10.1093/jnci/dju128 [published Online First: 2014/07/10]
5. Oken MM, Creech RH, Tormey DC, et al. Toxicity and response criteria of the Eastern Cooperative Oncology Group. *American Journal of Clinical Oncology* 1982;5(6)
6. FDA-NIH Biomarker Working Group. BEST (Biomarkers, EndpointS, and other Tools) Resource [Internet]. 2016-. [Web page]. Silver Spring (MD) National Institutes of Health (US); [updated January 25, 2021. Glossary]. Available from: <https://www.ncbi.nlm.nih.gov/books/NBK338448/> accessed March 3 2021.
7. Karnofsky D, Burchenal J. Evaluation of Chemotherapeutic Agents. *New York, NY, Columbia University* 1949:19.
8. Simcock R, Wright J. Beyond Performance Status. *Clinical Oncology* 2020;32(9):553-61. doi: <https://doi.org/10.1016/j.clon.2020.06.016>
9. Blagden SP, Charman SC, Sharples LD, et al. Performance status score: do patients and their oncologists agree? *Br J Cancer* 2003;89(6):1022-27. doi: 10.1038/sj.bjc.6601231
10. US Food and Drug Administration (FDA). Guidance for industry: patient-reported outcome measures: use in medical product development to support labeling claims. 2009 [Available from: <http://www.fda.gov/downloads/Drugs/GuidanceComplianceRegulatoryInformation/Guidances/UCM193282.pdf>. accessed August 31 2017.

11. Basch E. The Missing Voice of Patients in Drug-Safety Reporting. *New England Journal of Medicine* 2010;362(10):865-69. doi: 10.1056/NEJMp0911494
12. Moriates C, Shah NT, Arora VM. First, do no (financial) harm. *JAMA* 2013;310(6):577-78. doi: 10.1001/jama.2013.7516
13. Kluetz PG, Papadopoulos EJ, Johnson LL, et al. Focusing on Core Patient-Reported Outcomes in Cancer Clinical Trials-Response. *Clin Cancer Res* 2016;22(22):5618. doi: 10.1158/1078-0432.CCR-16-2140 [published Online First: 2017/02/06]
14. US Food and Drug Administration (FDA). Core Patient-Reported Outcomes in Cancer Clinical Trials: Draft Guidance for Industry 2021 [Available from: <https://www.fda.gov/regulatory-information/search-fda-guidance-documents/core-patient-reported-outcomes-cancer-clinical-trials> accessed May 4 2022.
15. Basch E, Geoghegan C, Coons SJ, et al. Patient-Reported Outcomes in Cancer Drug Development and US Regulatory Review: Perspectives From Industry, the Food and Drug Administration, and the Patient. *JAMA Oncology* 2015;1(3):375-79. doi: 10.1001/jamaoncol.2015.0530
16. European Organisation for Research and Treatment of Cancer. EORTC Quality of Life Questionnaires [Website]. [Available from: <https://qol.eortc.org/questionnaires/> accessed 1/21/2021 2021.
17. Health Measures. PROMIS (Patient-Reported Outcomes Measurement Information System) [Available from: <https://www.healthmeasures.net/explore-measurement-systems/promis> accessed 1/21/2021 2021.
18. Functional Assessment of Chronic Illness Therapy (FACIT). FACIT Measures & Searchable Library [accessed 1/21/2021 2021.
19. Dueck AC, Mendoza TR, Mitchell SA, et al. Validity and Reliability of the US National Cancer Institute's Patient-Reported Outcomes Version of the Common Terminology Criteria for Adverse Events (PRO-CTCAE). *JAMA Oncol* 2015;1(8):1051-9. doi: 10.1001/jamaoncol.2015.2639
20. Collins JT, Noble S, Davies HE, et al. Performance status agreement assessed by the patient and clinician in a rapid access lung cancer service: Can either predict completion of treatment? *European Journal of Cancer Care* 2019;28(3):e13004. doi: <https://doi.org/10.1111/ecc.13004>
21. Martin L, Watanabe S, Fainsinger R, et al. Prognostic Factors in Patients With Advanced Cancer: Use of the Patient-Generated Subjective Global Assessment in Survival Prediction. *Journal of Clinical Oncology* 2010;28(28):4376-83. doi: 10.1200/JCO.2009.27.1916
22. Bauer J, Capra S, Ferguson M. Use of the scored Patient-Generated Subjective Global Assessment (PG-SGA) as a nutrition assessment tool in patients with cancer. *European Journal of Clinical Nutrition* 2002;56(8):779-85. doi: 10.1038/sj.ejcn.1601412
23. Abbott J, Teleni L, McKavanagh D, et al. Patient-Generated Subjective Global Assessment Short Form (PG-SGA SF) is a valid screening tool in chemotherapy outpatients. *Supportive Care in Cancer* 2016;24(9):3883-87. doi: 10.1007/s00520-016-3196-0
24. ECDEU Assessment Manual for Psychopharmacology. Rockville, MD: US Department of Health, Education, and Welfare - Public Health Service - Alcohol, Drug Abuse, and Mental Health Administration.
25. Peipert JD, Chapman R, Shaunfield S, et al. Do You Recall?: Results From a Within-Person Recall Study of the Patient-Reported Outcomes Measurement Information System (PROMIS) Short Form v2.0 - Physical Function 8c. *Value Health* 2022;25(2):161-66. doi: 10.1016/j.jval.2021.08.011 [published Online First: 20211003]
26. Hantel A, DuMontier C, Odejide OO, et al. Gait speed, survival, and recommended treatment intensity in older adults with blood cancer requiring treatment. *Cancer* 2020 doi: 10.1002/ncr.33344 [published Online First: 2020/11/26]
27. Studenski S, Perera S, Patel K, et al. Gait speed and survival in older adults. *JAMA* 2011;305(1):50-8. doi: 10.1001/jama.2010.1923 [published Online First: 2011/01/06]

28. Overcash JA, Rivera HR, Jr. Physical performance evaluation of older cancer patients: a preliminary study. *Crit Rev Oncol Hematol* 2008;68(3):233-41. doi: 10.1016/j.critrevonc.2008.07.001 [published Online First: 2008/09/16]
29. Solway S, Brooks D, Lacasse Y, et al. A Qualitative Systematic Overview of the Measurement Properties of Functional Walk Tests Used in the Cardiorespiratory Domain. *Chest* 2001;119(1):256-70. doi: <https://doi.org/10.1378/chest.119.1.256>
30. Bohannon R. Six-Minute Walk Test: A Meta-Analysis of Data From Apparently Healthy Elders. *Topics in Geriatric Rehabilitation* 2007;23:155-60. doi: 10.1097/01.TGR.0000270184.98402.ef
31. ATS statement: guidelines for the six-minute walk test. *Am J Respir Crit Care Med* 2002;166(1):111-7. doi: 10.1164/ajrccm.166.1.at1102 [published Online First: 2002/07/02]
32. Schmidt K, Vogt L, Thiel C, et al. Validity of the six-minute walk test in cancer patients. *Int J Sports Med* 2013;34(7):631-6. doi: 10.1055/s-0032-1323746 [published Online First: 2013/02/28]
33. Musanti R, Chao Y-Y, Collins K. Fitness and Quality of Life Outcomes of Cancer Survivor Participants in a Community Exercise Program. *Journal of the advanced practitioner in oncology* 2019;10(1):24-37. [published Online First: 01/01]
34. Mikkelsen MK, Berg-Beckhoff G, Frederiksen P, et al. Estimating physical activity and sedentary behaviour in a free-living environment: A comparative study between Fitbit Charge 2 and Actigraph GT3X. *PLoS One* 2020;15(6):e0234426. doi: 10.1371/journal.pone.0234426 [published Online First: 2020/06/12]
35. Lang CE, Barth J, Holleran CL, et al. Implementation of Wearable Sensing Technology for Movement: Pushing Forward into the Routine Physical Rehabilitation Care Field. *Sensors (Basel)* 2020;20(20) doi: 10.3390/s20205744 [published Online First: 2020/10/15]
36. Kelly P, Fitzsimons C, Baker G. Should we reframe how we think about physical activity and sedentary behaviour measurement? Validity and reliability reconsidered. *The International Journal of Behavioral Nutrition and Physical Activity* 2016;13
37. Adans-Dester C, Hankov N, O'Brien A, et al. Enabling precision rehabilitation interventions using wearable sensors and machine learning to track motor recovery. *NPJ Digit Med* 2020;3:121. doi: 10.1038/s41746-020-00328-w [published Online First: 2020/10/08]
38. Hsueh MC, Rutherford R, Chou CC, et al. Objectively assessed physical activity patterns and physical function in community-dwelling older adults: a cross-sectional study in Taiwan. *BMJ Open* 2020;10(8):e034645. doi: 10.1136/bmjopen-2019-034645 [published Online First: 2020/08/18]
39. Jonker LT, Hendriks S, Lahr MM, et al. Postoperative recovery of accelerometer-based physical activity in older cancer patients. *Eur J Surg Oncol* 2020 doi: 10.1016/j.ejso.2020.06.012 [published Online First: 2020/07/20]
40. Kolk D, Aarden JJ, MacNeil-Vroomen JL, et al. Factors Associated with Step Numbers in Acutely Hospitalized Older Adults: The Hospital-Activities of Daily Living Study. *J Am Med Dir Assoc* 2020 doi: 10.1016/j.jamda.2020.06.027 [published Online First: 2020/07/28]
41. Graham SA, Jeste DV, Lee EE, et al. Associations Between Heart Rate Variability Measured With a Wrist-Worn Sensor and Older Adults' Physical Function: Observational Study. *JMIR Mhealth Uhealth* 2019;7(10):e13757. doi: 10.2196/13757 [published Online First: 2019/10/28]
42. Greenberg J, Mace RA, Popok PJ, et al. Psychosocial Correlates of Objective, Performance-Based, and Patient-Reported Physical Function Among Patients with Heterogeneous Chronic Pain. *J Pain Res* 2020;13:2255-65. doi: 10.2147/JPR.S266455 [published Online First: 2020/09/29]
43. Alharbi M, Bauman A, Neubeck L, et al. Validation of Fitbit-Flex as a measure of free-living physical activity in a community-based phase III cardiac rehabilitation population. *Eur J Prev Cardiol* 2016;23(14):1476-85. doi: 10.1177/2047487316634883 [published Online First: 2016/02/26]
44. Brazendale K, Decker L, Hunt ET, et al. Validity and Wearability of Consumer-based Fitness Trackers in Free-living Children. *Int J Exerc Sci* 2019;12(5):471-82. [published Online First: 2019/03/23]

- 1  
2  
3 45. Reddy RK, Pooni R, Zaharieva DP, et al. Accuracy of Wrist-Worn Activity Monitors During  
4 Common Daily Physical Activities and Types of Structured Exercise: Evaluation Study. *JMIR*  
5 *Mhealth Uhealth* 2018;6(12):e10338. doi: 10.2196/10338 [published Online First: 2018/12/12]  
6  
7 46. Jeffery MM, Ahadpour M, Allen S, et al. Acute pain pathways: protocol for a prospective cohort  
8 study. *BMJ Open* 2022;12(7):e058782. doi: 10.1136/bmjopen-2021-058782 [published Online  
9 First: 20220705]  
10  
11 47. Dhruva SS, Ross JS, Akar JG, et al. Aggregating multiple real-world data sources using a patient-  
12 centered health-data-sharing platform. *NPJ Digit Med* 2020;3:60. doi: 10.1038/s41746-020-0265-  
13 z [published Online First: 20200420]  
14  
15 48. Pew Research Center. Mobile Technology and Home Broadband 2021 2021 [Available from:  
16 <https://www.pewresearch.org/internet/2021/06/03/mobile-technology-and-home-broadband-2021/>  
17 accessed December 30 2021.  
18  
19  
20  
21  
22  
23  
24  
25  
26  
27  
28  
29  
30  
31  
32  
33  
34  
35  
36  
37  
38  
39  
40  
41  
42  
43  
44  
45  
46  
47  
48  
49  
50  
51  
52  
53  
54  
55  
56  
57  
58  
59  
60

## Appendices

### Appendix (Supplementary Material) 1: Inclusion and Exclusion Criteria for the In4M Study

#### 1.1.1. Inclusion Criteria

- 1) Age 18 and over;
- 2) English- or Spanish-speaking;
- 3) Pregnant and non-pregnant patients are eligible for participation in this study
- 4) Eligible cancer type and planned intravenous cytotoxic chemotherapy regimen (defined as including 1 or more cytotoxic agents)
- 5) ECOG Performance Score of < 3
- 6) Breast cancer patients
  - a) Patients with any stage breast cancer for whom a new intravenous cytotoxic chemotherapy regimen is planned within the next 8 weeks (patients with local/regional/distant recurrences are allowed; patients with concurrent/prior/future immunotherapy/radiotherapy, targeted therapy, and endocrine therapy for breast cancer are allowed)
- 7) Lymphoma patients
  - a) Lymphoma patients of any histology, stage or line of treatment planned to receive a new intravenous cytotoxic containing chemotherapy regimen (patients planned to receive radiation, maintenance chemotherapy, consolidation stem cell transplant or chimeric antigen receptor T (CAR-T) cell therapy are allowed)
- 8) If patients are receiving the above standard therapies as part of a clinical trial which may include a novel agent or combination, they are also eligible for the present study if the therapeutic protocol permits enrollment in both studies
- 9) Willing and able to give consent and participate in study
- 10) Able to access a mobile smartphone or tablet or computer with web access every day to complete study surveys; able to regularly upload data from the Fitbit to a in a way that it can be transferred to Hugo.
- 11) Willing and able to perform an in-clinic 6-minute walk test (gait aides are permitted if regularly used by the patient). If a patient is recruited remotely outside of Mayo Clinic Rochester or Yale Smilow Cancer Center New Haven, 6-minute walk test may be omitted.
- 12) Willing to use the health data sharing platform

Potential subjects who do not meet all of the enrollment criteria will not be enrolled. Any deviations from these criteria must be reported in accordance with IRB Policies and Procedures.

### 1.1.2. Exclusion Criteria

- 1) Prior intravenous cytotoxic chemotherapy within 3 weeks prior to study enrollment
- 2) Excluded regimens (due to length of hospitalization required for chemotherapy administration):
  - a) R-CODOX-M/IVAC,
  - b) DA-R-EPOCH (inpatient)
- 3) Excluded histology (due to length of hospitalization and inpatient predominant treatment for required chemotherapy): primary central nervous system lymphoma
  - a) Other regimens with an anticipated high duration of inpatient care time, at PI discretion
- 4) Lack of access to a mobile smartphone or tablet or computer with web access
- 5) Unable or unwilling to upload data from the Fitbit
- 6) Unable or unwilling to use the health data sharing platform
- 7) Unable to give consent and be enrolled

1  
2  
3  
4  
5  
6  
7  
8  
9  
10  
11  
12  
13  
14  
15  
16  
17  
18  
19  
20  
21  
22  
23  
24  
25  
26  
27  
28  
29  
30  
31  
32  
33  
34  
35  
36  
37  
38  
39  
40  
41

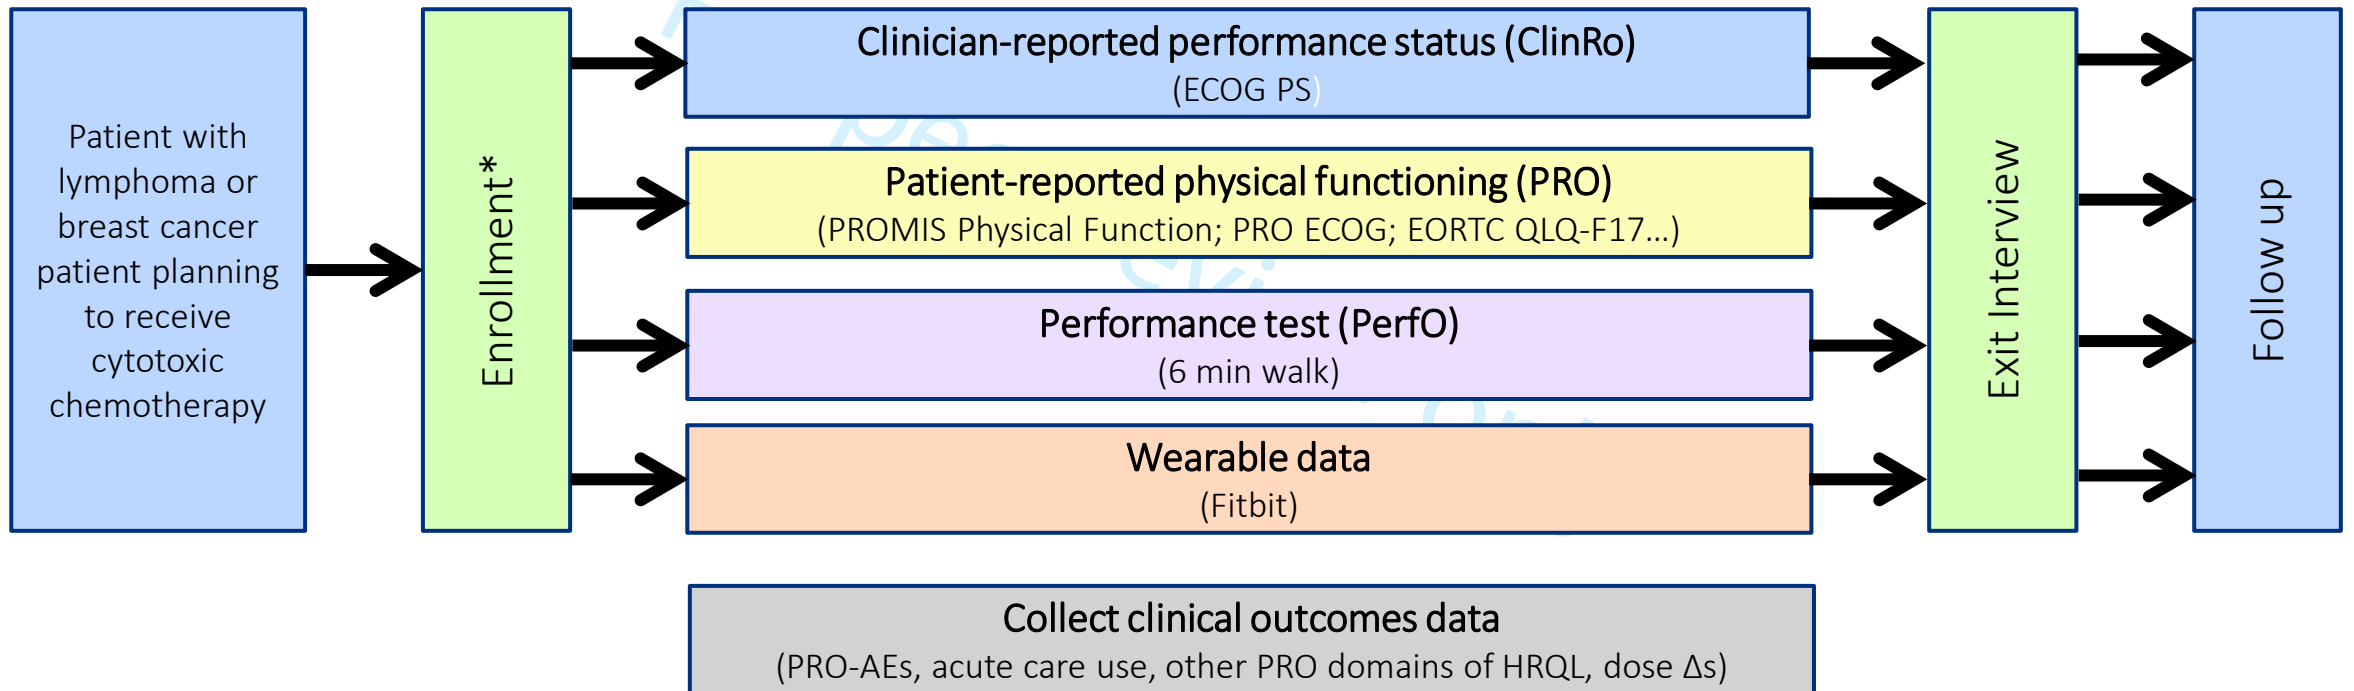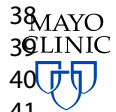



## Tables

Table 1. Schedule of Assessments

|                                  |         | Standard 2-6 month intravenous chemotherapy treatment; total 9 months study follow up |    |    |    |    |    |    |    |    |    |    |    |    |    |    |    |
|----------------------------------|---------|---------------------------------------------------------------------------------------|----|----|----|----|----|----|----|----|----|----|----|----|----|----|----|
|                                  | Lead-in | BL                                                                                    | W2 | W3 | W4 | W5 | W6 | W7 | W8 | M3 | M4 | M5 | M6 | M7 | M8 | M9 | ** |
| Clinician- reported ECOG*        |         | X                                                                                     |    |    |    |    |    |    |    |    |    |    |    |    |    |    |    |
| Symptomatic AE (PRO-CTCAE)       |         | X                                                                                     | X  | X  | X  | X  | X  | X  | X  | X  | X  | X  | X  | X  | X  | X  | X  |
| FACT GP5                         |         | X                                                                                     | X  | X  | X  | X  | X  | X  | X  | X  | X  | X  | X  | X  | X  | X  | X  |
| PGI-S                            |         | X                                                                                     | X  | X  | X  | X  | X  | X  | X  | X  | X  | X  | X  | X  | X  | X  | X  |
| PROMIS Physical Function SF 8c   |         | X                                                                                     | X  | X  | X  | X  | X  | X  | X  | X  | X  | X  | X  | X  | X  | X  | X  |
| EORTC QLQ-F17 Role Function only |         |                                                                                       | X  |    |    |    | X  |    | X  |    | X  | X  |    | X  | X  |    |    |
| PRO-ECOG                         |         | X                                                                                     | X  |    | X  |    | X  |    | X  | X  | X  | X  | X  | X  | X  | X  | X  |
| EORTC QLQ-F17                    |         | X                                                                                     |    |    | X  |    |    |    |    | X  |    |    | X  |    |    |    | X  |
| PGI-C                            |         |                                                                                       | X  | X  | X  | X  | X  | X  | X  | X  | X  | X  | X  | X  | X  | X  | X  |
| 6MWT†                            |         | X                                                                                     |    |    |    |    |    |    |    | X  |    |    |    |    |    |    |    |
| Exit Questionnaire               |         |                                                                                       |    |    |    |    |    |    |    |    |    |    |    |    |    |    | X  |
| Wearable Data                    | X‡->    | Continuous wearable data throughout                                                   |    |    |    |    |    |    |    |    |    |    |    |    |    |    |    |

BL – baseline, W - week, M – month;  
 \* at baseline (CRA to ensure ECOG is recorded at baseline by clinical provider), and where available at follow up  
 \*\* - context dependent long-term follow-up,  
 † 6MWT at baseline and at M3 will be performed in clinic (with CRA) for patients treated at primary sites available for assessment. The window for the M3 6MWT assessment is anytime during the 3<sup>rd</sup> month.  
 ‡ Lead-in time period of at least 24 hours prior to initiation of cancer-directed treatment  
 Highlighted time points are “high yield” time points for reminders and will include CRA phone calls to patient if PROs have not been completed

# BMJ Open

## Integrating 4 Methods to Evaluate Physical Function in Patients with Cancer (In4M): Protocol for a prospective cohort study

|                                 |                                                                                                                                                                                                                                                                                                                                                                                                                                                                                                                                                                                                                                                                                                                                                                                                                                                                                                                                                                                                                                                                                                                                                                                                                                                                                                                                                                                                                                                                                                                                                                                                                                                                                                                                                                                                                   |
|---------------------------------|-------------------------------------------------------------------------------------------------------------------------------------------------------------------------------------------------------------------------------------------------------------------------------------------------------------------------------------------------------------------------------------------------------------------------------------------------------------------------------------------------------------------------------------------------------------------------------------------------------------------------------------------------------------------------------------------------------------------------------------------------------------------------------------------------------------------------------------------------------------------------------------------------------------------------------------------------------------------------------------------------------------------------------------------------------------------------------------------------------------------------------------------------------------------------------------------------------------------------------------------------------------------------------------------------------------------------------------------------------------------------------------------------------------------------------------------------------------------------------------------------------------------------------------------------------------------------------------------------------------------------------------------------------------------------------------------------------------------------------------------------------------------------------------------------------------------|
| Journal:                        | <i>BMJ Open</i>                                                                                                                                                                                                                                                                                                                                                                                                                                                                                                                                                                                                                                                                                                                                                                                                                                                                                                                                                                                                                                                                                                                                                                                                                                                                                                                                                                                                                                                                                                                                                                                                                                                                                                                                                                                                   |
| Manuscript ID                   | bmjopen-2023-074030.R1                                                                                                                                                                                                                                                                                                                                                                                                                                                                                                                                                                                                                                                                                                                                                                                                                                                                                                                                                                                                                                                                                                                                                                                                                                                                                                                                                                                                                                                                                                                                                                                                                                                                                                                                                                                            |
| Article Type:                   | Protocol                                                                                                                                                                                                                                                                                                                                                                                                                                                                                                                                                                                                                                                                                                                                                                                                                                                                                                                                                                                                                                                                                                                                                                                                                                                                                                                                                                                                                                                                                                                                                                                                                                                                                                                                                                                                          |
| Date Submitted by the Author:   | 19-Jul-2023                                                                                                                                                                                                                                                                                                                                                                                                                                                                                                                                                                                                                                                                                                                                                                                                                                                                                                                                                                                                                                                                                                                                                                                                                                                                                                                                                                                                                                                                                                                                                                                                                                                                                                                                                                                                       |
| Complete List of Authors:       | <p>Thanarajasingam, Gita ; Mayo Clinic, Division of Hematology<br/> Kluetz, Paul; FDA<br/> Bhatnagar, Vishal; FDA<br/> Brown, Abbie ; Mayo Clinic, Health Education and Content Services<br/> Cathcart-Rake, Elizabeth; Mayo Clinic, Department of Medical Oncology<br/> Diamond, Matthew ; FDA<br/> Faust , Louis; Mayo Clinic, Division of Health Care Delivery Research<br/> Fiero, Mallorie H.; US Food and Drug Administration,<br/> Huntington, Scott; Yale University, Department of internal Medicine; Yale School of Medicine, Yale's Cancer Outcomes, Public Policy, and Effectiveness Research (COPPER) Center<br/> Jeffery, Molly; Mayo Clinic, Division of Health Care Delivery Research and Department of Emergency Medicine; Mayo Clinic, Department of Emergency Medicine<br/> Jones, Lee ; Patient Advocate<br/> Noble, Brie ; Mayo Clinic, Department of Quantitative Health Sciences<br/> Paludo , Jonas; Mayo Clinic, Division of Hematology<br/> Powers , Brad; CancerHacker Lab<br/> Ross, Joseph; Yale School of Medicine, Internal Medicine; Yale School of Medicine, Yale-New Haven Center for Outcomes Research and Evaluation (CORE)<br/> Ritchie, Jessica; Yale School of Medicine, Yale-New Haven Center for Outcomes Research and Evaluation (CORE)<br/> Ruddy, Kathryn; Mayo Clinic, Department of Medical Oncology<br/> Schellhorn, Sarah ; Yale School of Medicine, Department of Internal Medicine; Yale School of Medicine, Yale's Cancer Outcomes, Public Policy, and Effectiveness Research (COPPER) Center<br/> Tarver, Michelle; FDA<br/> Dueck, Amylou; Mayo Clinic, Department of Quantitative Health Sciences<br/> Gross, Cary; Yale School of Medicine; Yale School of Medicine, Yale's Cancer Outcomes, Public Policy, and Effectiveness Research (COPPER) Center</p> |
| <b>Primary Subject Heading</b>: | Oncology                                                                                                                                                                                                                                                                                                                                                                                                                                                                                                                                                                                                                                                                                                                                                                                                                                                                                                                                                                                                                                                                                                                                                                                                                                                                                                                                                                                                                                                                                                                                                                                                                                                                                                                                                                                                          |
| Secondary Subject Heading:      | Health services research                                                                                                                                                                                                                                                                                                                                                                                                                                                                                                                                                                                                                                                                                                                                                                                                                                                                                                                                                                                                                                                                                                                                                                                                                                                                                                                                                                                                                                                                                                                                                                                                                                                                                                                                                                                          |
| Keywords:                       | ONCOLOGY, Patient Reported Outcome Measures, Lymphoma < ONCOLOGY, Breast tumours < ONCOLOGY                                                                                                                                                                                                                                                                                                                                                                                                                                                                                                                                                                                                                                                                                                                                                                                                                                                                                                                                                                                                                                                                                                                                                                                                                                                                                                                                                                                                                                                                                                                                                                                                                                                                                                                       |

1  
2  
3  
4  
5  
6  
7  
8  
9  
10  
11  
12  
13  
14  
15  
16  
17  
18  
19  
20  
21  
22  
23  
24  
25  
26  
27  
28  
29  
30  
31  
32  
33  
34  
35  
36  
37  
38  
39  
40  
41  
42  
43  
44  
45  
46  
47  
48  
49  
50  
51  
52  
53  
54  
55  
56  
57  
58  
59  
60

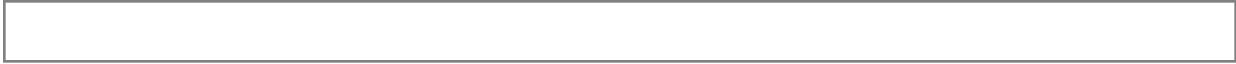

SCHOLARONE™  
Manuscripts

## **Integrating 4 Methods to Evaluate Physical Function in Patients with Cancer (In4M):**

### **Protocol for a prospective cohort study**

Gita Thanarajasingam<sup>1</sup>, Paul G. Kluetz<sup>2</sup>, Vishal Bhatnagar<sup>2</sup>, Abbie Brown<sup>3</sup>, Elizabeth Cathcart-Rake<sup>4</sup>, Matthew Diamond<sup>2</sup>, Louis Faust<sup>5</sup>, Mallorie H. Fiero<sup>2</sup>, Scott F. Huntington<sup>6,7</sup>, Molly Moore Jeffery<sup>5,8</sup>, Lee Jones<sup>9</sup>, Brie N. Noble<sup>10</sup>, Jonas Paludo<sup>1</sup>, Brad Powers<sup>11</sup>, Joseph S. Ross<sup>6,12,13</sup>, Jessica D. Ritchie<sup>12</sup>, Kathryn J. Ruddy<sup>4</sup>, Sarah E. Schellhorn<sup>6,7</sup>, Michelle E. Tarver<sup>2</sup>, Amylou C. Dueck<sup>10</sup>, Cary P. Gross<sup>6,7,12,14</sup>

#### Author affiliations:

<sup>1</sup>Division of Hematology, Mayo Clinic, Rochester, Minnesota, USA

<sup>2</sup>U.S. Food and Drug Administration, Silver Spring, Maryland, USA

<sup>3</sup>Health Education and Content Services, Mayo Clinic, Rochester, Minnesota, USA

<sup>4</sup>Department of Medical Oncology, Mayo Clinic, Rochester, Minnesota, USA

<sup>5</sup>Division of Health Care Delivery Research, Kern Center for the Science of Health Care Delivery, Mayo Clinic, Rochester, Minnesota, USA

<sup>6</sup>Department of Internal Medicine, Yale School of Medicine, New Haven, Connecticut, USA

<sup>7</sup>Yale's Cancer Outcomes, Public Policy, and Effectiveness Research (COPPER) Center, Yale School of Medicine, New Haven, Connecticut, USA

<sup>8</sup>Department of Emergency Medicine, Mayo Clinic, Rochester, Minnesota, USA

<sup>9</sup>Patient advocate, Arlington, Virginia, USA

<sup>10</sup>Department of Quantitative Health Sciences, Mayo Clinic, Phoenix, Arizona, USA

<sup>11</sup>CancerHacker Lab, Boston, Massachusetts, USA

<sup>12</sup>Yale-New Haven Center for Outcomes Research and Evaluation (CORE), New Haven, Connecticut, USA

<sup>13</sup>Department of Health Policy and Management, Yale School of Public Health, New Haven, Connecticut, USA

<sup>14</sup>Department of Chronic Disease Epidemiology, Yale School of Public Health, New Haven, Connecticut, USA

Abstract word count: 248

Body word count: 4059

Figures: 1

Tables: 1

Protocol: July 15, 2023 version 2

Correspondence to:

1  
2  
3  
4  
5  
6  
7  
8  
9  
10  
11  
12  
13  
14  
15  
16  
17  
18  
19  
20  
21  
22  
23  
24  
25  
26  
27  
28  
29  
30  
31  
32  
33  
34  
35  
36  
37  
38  
39  
40  
41  
42  
43  
44  
45  
46  
47  
48  
49  
50  
51  
52  
53  
54  
55  
56  
57  
58  
59  
60

Gita Thanarajasingam, MD  
Division of Hematology  
Mayo Clinic  
200 1<sup>st</sup> Street SW  
Rochester, Minnesota 55905  
Email: [thanarajasingam.gita@mayo.edu](mailto:thanarajasingam.gita@mayo.edu)  
Phone: (507) 284-6400

For peer review only

## **ABSTRACT**

### ***Introduction***

Accurate, patient-centered evaluation of physical function in patients with cancer can provide important information on the functional impacts experienced by patients both from the disease and its treatment. Increasingly, digital health technology is facilitating and providing new ways to measure symptoms and function. There is a need to characterize the longitudinal measurement characteristics of physical function assessments, including clinician-reported physical function (ClinRo), patient-reported physical function (PRO), performance outcome tests (PerfO) and wearable data, to inform regulatory and clinical decision-making in cancer clinical trials and oncology practice.

### ***Methods and analysis***

In this prospective study, we are enrolling 200 English- and/or Spanish-speaking patients with breast cancer or lymphoma seen at Mayo Clinic or Yale University who will receive standard of care intravenous cytotoxic chemotherapy. Physical function assessments will be obtained longitudinally using multiple assessment modalities. Participants will be followed for 9 months using a patient-centered health data aggregating platform that consolidates study questionnaires, electronic health record data, and activity and sleep data from a wearable sensor. Data analysis will focus on understanding variability, sensitivity, and meaningful changes across the included physical function assessments and evaluating their relationship to key clinical outcomes. Additionally, the feasibility of multi-modal physical function data collection in real-world patients with breast cancer or lymphoma will be assessed, as will patient impressions of the usability and acceptability of the wearable sensor, data aggregation platform, and PROs.

### ***Ethics and dissemination***

1  
2  
3 This study has received approval from IRBs at Mayo Clinic, Yale University, and the U.S. Food  
4 & Drug Administration. Results will be made available to participants, funders, the research  
5  
6 community, and the public.  
7  
8  
9

10  
11  
12 **Registration Details.** The trial registration number for this study is NCT05214144  
13

14 ***Strengths & limitations of this study***  
15

- 16  
17 • This study addresses an important unmet need by characterizing the performance  
18 characteristics of multiple patient-centered physical function measures in patients with  
19 breast cancer or lymphoma. Physical function is an important and undermeasured  
20 clinical outcome. Scientifically rigorous capture and measurement of physical function  
21 constitutes a key component of cancer treatment tolerability assessment both from a  
22 regulatory and clinical perspective.  
23
- 24 • This study will include patients with lymphoma or breast cancer receiving a broad range  
25 of cytotoxic chemotherapy regimens. While recruitment will occur at two academic sites,  
26 patients who ultimately receive treatment at local community sites will be included.  
27
- 28 • A patient-centered health data aggregating platform facilitates the delivery of patient-  
29 reported outcome measures and collection of wearable data to researchers, while reducing  
30 patient burden compared to traditional patient-generated data collection and aggregation  
31 methods  
32
- 33 • Heterogeneity in patient willingness or comfort engaging with mobile products including  
34 smartphones and wearables, enrollment primarily at large academic centers, and the  
35 modest sample size are potential limitations to the external validity of the study  
36  
37  
38  
39  
40  
41  
42  
43  
44  
45  
46  
47  
48  
49  
50  
51  
52  
53  
54  
55  
56  
57  
58  
59  
60

## MAIN MANUSCRIPT

### INTRODUCTION

Cancer clinical trials have long emphasized important metrics of tumor response and survival rates to evaluate the benefit of cancer trials. However, there has been increasing recognition of the importance of systematically assessing how patients feel and function – tolerability – while on treatment (1). Disease-related symptoms, physical function, and toxicity (i.e. side effects from treatment) are core outcomes that have been identified by the United States Food & Drug Administration to inform the safety, tolerability and efficacy of an investigational cancer therapy (2-3).

Physical function (PF) is defined as the ability to carry out day-to-day activities that require physical effort (4). Symptoms related to a patient's underlying cancer as well as treatment-related toxicity can impact PF. PF can be assessed using multiple complementary approaches. These include clinician- or investigator-reports (e.g. Eastern Cooperative Oncology Group [ECOG] performance status [PS]) (5), patient-reported outcome measures (PROs; e.g., questionnaires administered to patients that assess their physical functioning), performance outcome measures (6) involving measurement observation of a patient's function (e.g. 6-minute walk test [6MWT], Timed Up and Go [TUG] test), and digital health technologies such as wearable sensors. Given that there are multiple approaches to assessing PF, quantitative data are needed to understand differences in measurement characteristics between these distinct data sources.

#### ***Historical approach to evaluating physical function in cancer clinical trials: clinician-reported assessment (ClinRo)***

The widely accepted method for recording a patient's overall functional status in most cancer clinical trials has historically been clinician- or investigator-reported PS using scales such as the



1  
2  
3 Karnofsky performance status (KPS) (7) and its derivative, the ECOG PS (5). These tools have  
4 become a ubiquitous, international standard in hematology/oncology practice and research.

5  
6 While the simplicity of the PS is attractive, it is also a drawback, as it lacks granularity, which  
7 becomes particularly relevant in the setting of patients at ECOG PS 2-3 and clinical trial  
8 eligibility. Many trial eligibility criteria exclude patients with ECOG PS  $\geq 2$ , thus leaving the  
9 subjective judgement of an oncologist as the main factor determinant of whether a patient can  
10 receive what is often a highly desirable therapy on study, or not (8). Additionally, the score is  
11 clinician-assessed, rather than directly reflecting the patient experience (9), and is rarely assessed  
12 post-baseline in most cancer trials.  
13  
14

### 15 ***Novel and more comprehensive approaches to measuring PF which complement ClinRo***

#### 16 *Patient-reported outcomes (PROs)*

17  
18 PROs are reports of the status of the patient's health that come directly from the patient,  
19 without interpretation of the patient's response by a clinician or caregiver (10). PROs are an  
20 assessment method that can be used to directly capture many aspects of a patients' health, from  
21 individual symptoms to functional domains such as physical, emotional, cognitive, and social  
22 function, to the broad multi-domain concept of health-related quality of life (HRQOL).  
23

24  
25 Clinicians often miss or underreport symptomatic adverse events (AE) experienced by patients  
26 that can lead to physical, psychological, and other toxicities going unrecognized (11-12). The  
27 systematic incorporation of PRO assessment to measure symptoms and function that affect  
28 patients' HRQOL in cancer clinical trials is now recognized as critical to complement standard  
29 tumor, survival, and clinician-reported safety data by patients, clinicians, industry, academics,  
30 and regulators (13-15).  
31  
32  
33  
34  
35  
36  
37  
38  
39  
40  
41  
42  
43  
44  
45  
46  
47  
48  
49  
50  
51  
52

1  
2  
3 Some of the more commonly used PRO measurement systems used in cancer research  
4 include the European Organisation for Research and Treatment of Cancer (EORTC)  
5 questionnaires (16), Patient-Reported Outcomes Measurement Information System (PROMIS)  
6 questionnaires (17), and the Functional Assessment of Chronic Illness Therapy (FACIT)  
7 questionnaires (18). Several of these tools include items or subscales that assess physical  
8 functioning. The Patient-Reported Outcomes version of the Common Terminology Criteria for  
9 Adverse Events (PRO-CTCAE) (19) is a library of important symptomatic adverse events that  
10 can quantify symptomatic toxicities from the patient perspective and can inform causative  
11 symptoms that may impact physical functioning. Additionally, prior studies have demonstrated  
12 the benefit of patients (in addition to clinicians) directly reporting their own ECOG PS (20), and  
13 patient-friendly versions of the ECOG PS are available (21-23).

14  
15 The Patient Global Impression scales (“of change” abbreviated as PGI-C; or “of severity”  
16 abbreviated as PGI-S) are single item questions used to evaluate the patient’s perception of  
17 change in PF and severity (24). These questions are often used to assess meaningful change in  
18 PRO scores and other functional measures. There are also questions that are disease-specific,  
19 and tools designed to focus more specifically on a particular domain such as physical function  
20 (25).

#### 21 22 *Performance outcome (PerfO) measures*

23  
24 PerfO measures are defined as a measurement based on standardized task(s) actively  
25 undertaken by a patient according to a set of instructions. A PerfO assessment may be  
26 administered by an appropriately trained individual or completed by the patient independently  
27 (6). There are a variety of validated PerfO measures that can be used to more objectively  
28 measure a patient’s physical PS, including the TUG test, the Sit-Rise test, the Short Physical  
29

1  
2  
3 Performance Battery, gait speed, and grip strength (26-27). The TUG has been used to predict  
4 falls in a cohort of geriatric patients with cancer, but the others have not been validated in  
5  
6 broader cancer cohorts (28). As these tools are primarily used in geriatric populations, they may  
7  
8 not be as discriminating with younger patients who have better baseline physical fitness.  
9

10  
11  
12 On the other hand, the 6MWT is a comprehensive measure of exercise capacity suitable for a  
13 broad age range and has been selected as the PerfO of interest in this study. The 6MWT  
14  
15 encompasses components of mobility, endurance, and functional capacity (29-31). It is  
16  
17 relatively straightforward to administer, requires little expertise or training for the patient, and  
18  
19 involves minimal equipment. The 6MWT has been used in patients undergoing cancer treatment  
20  
21 as well as cancer survivors (32-33) and normative values for patients with hematologic  
22  
23 malignancies have been published.  
24  
25

### 26 27 28 *Wearable technologies* 29

30  
31 Wearable products have steadily advanced over the last several years with rapidly evolving  
32  
33 sensor technology to measure human movement, such as accelerometers, magnetometers, and  
34  
35 gyroscopes (34). Commercially available, consumer-grade wearables capable of tracking  
36  
37 movement have become ubiquitous to the general public in recent years (35). Wearable  
38  
39 technology mitigates some of the limitations of self-reported data (e.g., avoiding recall bias), and  
40  
41 the narrow validity of data generated in tightly controlled research lab environments (34-36).  
42  
43

44  
45 Wearables have been used to assess physical rehabilitation of patients with disabilities and  
46  
47 elderly or hospitalized patients (37-40). Both capacity (what a patient can do, such as maximal  
48  
49 gait speed) and performance (what a patient does, such as total steps per day) have been  
50  
51 measured using wearables when assessing changes in PF (35). A recent study demonstrated a  
52  
53 correlation of heart rate variability measured through a wearable product with PF assessed using  
54  
55  
56  
57  
58  
59

1  
2  
3 the Short Physical Performance Battery scores, TUG scores, and self-reported PF (SF-36  
4 physical composite scores) (41). The correlation of average daily steps with the 6MWT, another  
5 established capacity assessment, was also reported by a recent study (42).  
6  
7  
8  
9

10 Fitbit activity tracking products were selected for this study as they are familiar to consumers  
11 and have demonstrated acceptable accuracy for heart rate, step count and moderate to vigorous  
12 physical activities (MVPA) when compared to research-grade tracking products (43-45).  
13  
14  
15  
16  
17  
18  
19  
20  
21  
22  
23  
24  
25  
26  
27  
28  
29  
30  
31  
32  
33  
34  
35  
36  
37  
38  
39  
40  
41  
42  
43  
44  
45  
46  
47  
48  
49  
50  
51  
52  
53  
54  
55  
56  
57  
58  
59  
60

### ***Unmet needs in the evaluation of physical function in cancer patients***

There is an unmet need to better characterize the measurement characteristics of ClinRo, PRO, PerfO and wearable data to inform selection of measures to meet individual cancer clinical trial objectives. A firm scientific understanding of measurement characteristics including variability, sensitivity, and meaningful change across all modalities would advance our ability to make science-driven trial design decisions and best inform regulatory and clinical decision-making. Operational aspects including ease of use and adherence are also critical to identify methods to reduce missing data.

Few studies have demonstrated the logistical feasibility, sensitivity, and complementarity of different PF measurement modalities in the cancer treatment context. There has been no clear identification of meaningful levels of change for these measures either with respect to patient experience or in correlation with adverse event or hospitalization rates. Such data would inform potential use of PROs and digital hardware in the design of tolerability endpoints for regulatory review in cancer clinical trials in all phases of medical product (i.e., drug, device, and biologics) development.

In this prospective study, we will evaluate PF by four assessment modalities in patients with breast cancer or lymphoma receiving cytotoxic chemotherapy with standard clinical follow up and care.

#### ***Study Aims***

The purpose of this study is to integrate four PF methods (ClinRo, PRO, PerfO and wearable data) in a prospective cohort of patients receiving chemotherapy.

There are three main study aims:

- 1) To measure PF using ClinRo, PRO, PerfO and wearable data. This includes characterizing feasibility and assessment challenges by comparing levels of missing data and reasons for missingness across the PF modalities and report on trajectories of function as ascertained by the four PF modalities.
- 2) To explore associations between various sources of PF data and determine meaningful change thresholds. This includes assessing measurement characteristics of the different modalities, including sensitivity to change and identification of meaningful change thresholds; comparing changes within and between modalities; and exploring associations between changes in the PF modalities and subsequent clinical outcomes, such as patient-reported AEs, other patient-reported domains of HRQOL, acute care usage, and chemotherapy dose delay/reduction.
- 3) To assess patient acceptability and experience using the different PF assessment modalities, via the use of an exit questionnaire, to understand burden and usability of electronic PROs and wearable data collection from the patient perspective.

## METHODS

In this prospective study, we are collecting PF data across the four different assessment modalities in a population of patients with breast cancer or lymphoma receiving routine anticancer therapy including a cytotoxic chemotherapy. We plan to follow patients prospectively for 9 months, tracking clinician and patient self-report of physical functioning, PerfOs, and wearable data using a patient-centered health data sharing platform – Hugo Health (46-47) – that will consolidate data from electronic health records (EHR), patient surveys, and wearable data (See Figure 1, Study Schema). Patients use their personal smartphone or other web-connected mobile product to answer questionnaires about PF, symptoms, and adverse effects. Information

1  
2  
3 from the EHR is collected to record baseline clinical features, clinician-reported performance  
4 status, treatment plans, and outcomes including acute care usage (emergency department visits,  
5 hospitalizations), and chemotherapy dose reductions, delays, or discontinuations. The focus of  
6 this study is to characterize patients' physical function trajectories on cancer therapy without any  
7 intervention, so no exercise program or activity guidance are given.  
8  
9  
10  
11  
12  
13

14 The study is based at Mayo Clinic (Minnesota) and Yale University. Participants are  
15 recruited both at community and academic hospitals, as well as clinics affiliated with these sites.  
16  
17 Participants can be treated after recruitment at a local community site and followed remotely  
18 after study consent and enrollment is obtained at the primary site. Informational flyers are  
19 placed in waiting rooms of breast cancer and lymphoma clinic practices at both primary sites.  
20  
21 Charts of potential study candidates are reviewed by clinical investigators, and if potentially  
22 eligible, patients are approached about and consented for the study by the study research  
23 assistants. Each site will enroll 100 patients. Complete inclusion and exclusion criteria are in  
24 Appendix 1.  
25  
26  
27  
28  
29  
30  
31  
32  
33  
34

### 35 ***Measures and Data Collection***

36 A detailed description of Hugo Health, the electronic health data aggregating technology  
37 used to administer PRO questionnaires, collect patient electronic health record portal data, and  
38 aggregate wearable data in this study, has been published previously (46-47). All of the data and  
39 records described below and generated during this study are kept confidential in accordance with  
40 institutional policies and the Health Insurance Portability and Accountability Act (HIPAA) on  
41 subject privacy.  
42  
43  
44  
45  
46  
47  
48  
49  
50

51 *Clinician-Reported Performance Status (ClinRo) and Performance Outcomes (PerfO)*  
52  
53  
54  
55  
56  
57  
58  
59  
60

1  
2  
3 Clinician-reported performance status is recorded from the medical record into a REDcap  
4 form by research assistants every 3 months. The 6MWT is performed once at baseline (prior to  
5 start of chemotherapy) and at 3 months for participants treated at Mayo Clinic and Yale primary  
6 sites. Changes in performance between the two timepoints may be a result of learning effects  
7 rather than true change in performance, which is a potential limitation. Participants receiving  
8 care at a site other than Mayo Clinic Rochester or Yale University sites will not have an  
9 additional 6MWT observation.

### 19 *Patient-Reported Outcomes (PRO)*

21 Questionnaires are sent by Hugo to patients throughout the 9-month follow-up period  
22 (Supplementary Table 1). PROs assessing PF include the PROMIS version 2.0 physical function  
23 8c short form, PF questions from the EORTC QLQ-F17 instrument, a patient-adapted version of  
24 the ECOG PS (PRO-ECOG), and the PGI-C/PGI-S items pertaining to PF. Additional PROs that  
25 capture global assessments of quality of life and well-being (functional and QOL domains of the  
26 EORTC QLQ-F17 and selected items from the PRO-CTCAE, FACIT GP5) are used to assess  
27 the correlation of PF data with symptomatic toxicities, patient-reported AEs, and other domains  
28 of HRQOL. Hugo sends automated reminders if patients do not complete the weekly survey  
29 after 48 hours or the monthly survey after one week. Additionally, at key timepoints, research  
30 assistants call patients if questionnaires have not been completed after 5 days for weekly  
31 questionnaires or after 2 weeks and 2 days for the monthly questionnaires.

### 47 *Wearable data*

49 A Fitbit model with built-in GPS, the Fitbit Inspire, is used in this study. Multiple data  
50 parameters are recorded from the lead-in time point to the completion of month 9 of follow up.  
51 The lead-in time, for baseline data collection prior to initiation of cancer-directed therapy, was  
52  
53  
54  
55  
56  
57  
58  
59



1  
2  
3 pragmatically derived to be at least 24 hours. Fitbit data are automatically uploaded from the  
4 wearable to Fitbit's servers when the Bluetooth feature on the patient's wearable is turned on.  
5  
6 Hugo downloads that data through the Fitbit API regularly and links it to the other participant  
7 data.  
8  
9  
10  
11

12 Patients are instructed to (1) wear the Fitbit as much as possible during the day and night,  
13 limiting non-wear time to recharging periods (approximately 1-2 hours every 3 days) and (2)  
14 synchronize (upload) the Fitbit data from the wearable to Fitbit's servers every 3 days using the  
15 Fitbit smartphone application. Reminders to synchronize Fitbit data are delivered by Hugo to  
16 study participants on a weekly basis.  
17  
18  
19  
20  
21  
22  
23

24 Predefined parameters evaluating both capacity and performance measurements of PF from  
25 three domains (steps/distance, heart rate, and activity level) will be used for comparison with the  
26 other PF assessment modalities. Additional metrics of interest derived from the raw data  
27 parameters or obtained directly from Fitbit will be considered. These additional metrics may  
28 include distance walked per day, sleep duration per day, heart rate variability, sleep cycle  
29 duration, etc. Reporting non-adherence and abandonment will include a visualization of  
30 participant drop out over time accompanied by the total number of participants who dropped out  
31 and a distribution of time in the study. Among those who remained in the study, we will report  
32 the total remaining, number of days deemed compliant, as well as weeks considered compliant as  
33 defined by our completeness criteria. Participants who would no longer like to contribute their  
34 wearable data, but are interested in continuing to complete the PROs, are able to stay enrolled in  
35 the study.  
36  
37  
38  
39  
40  
41  
42  
43  
44  
45  
46  
47  
48  
49  
50

51 *Exit Questionnaire*  
52  
53  
54  
55  
56  
57  
58  
59  
60

1  
2  
3 An exit questionnaire designed specifically for this study is administered to all participants at  
4 month 9 to assess patients' perceptions of their own physical function, their feedback on surveys  
5 completed during the study, and their perspective on the wearable device. A full copy of the exit  
6 questionnaire is provided in Appendix 2.  
7  
8  
9  
10

### 11 *Analysis Plan*

12  
13  
14 Specific Aim 1: In order to characterize assessment challenges, completion rates will be  
15 computed and reasons for missing data will be described. For each PF metric, the completion  
16 rate will be computed at applicable time points using (1) a fixed denominator method using all  
17 patients ever enrolled, and (2) a variable denominator method using the number of active patients  
18 at each time point. For the variable denominator approach, at each timepoint, active participants  
19 are those who have not died and have not withdrawn from study participation. Intercurrent  
20 events including reason for study withdrawal, disease progression, and death will be summarized  
21 in analysis.  
22  
23  
24  
25  
26  
27  
28  
29  
30  
31  
32

33 To describe distributions of PF responses over time, the trajectory of each PF metric will be  
34 graphically explored using stream (spaghetti) plots and mean plots. Mean plots will employ raw  
35 means as well as estimated means from a general linear mixed modeling at each time point.  
36 Estimation will include group means and group mean changes from baseline.  
37  
38  
39  
40  
41

42 Specific Aim 2: To identify measurement characteristics of each PF metric, standard  
43 psychometric analyses investigating sensitivity to change and meaningful change thresholds will  
44 be carried out. These analyses will employ both anchor-based and distribution-based methods.  
45  
46  
47  
48  
49 The primary anchor will be PGI-C and the key secondary anchor will be PGI-S.  
50

51 Distribution-based analyses for each PF metric will include the mean, standard deviation,  
52 median, first quartile, third quartile, minimum, and maximum. Effect sizes representing small,  
53  
54  
55  
56  
57  
58  
59

1  
2  
3 moderate, and large effects will be computed as 0.2, 0.5, and 0.8 times the baseline standard  
4 deviation (48).  
5  
6

7  
8 Anchor-based analyses will estimate the mean change for each PF metric over time  
9  
10 according to how patients respond to the PGI-C and PGI-S items. Mean change at each post-  
11 baseline timepoint will be described using the mean and standard deviation within strata of  
12 patients grouped by their status change (those reporting worsening status; no change in status;  
13 and improved status) and their current limitations in PF (no limitations, mild or moderate  
14 limitations, and severe limitations). Additionally, the standardized response mean (SRM) will be  
15 computed as the mean change score divided by the standard deviation of the change scores  
16 within each change category (worsening vs. no change vs. improvement) or severity category  
17 (normal vs. mild/moderate vs. severe). Values greater than 0.8 will be considered large and  
18 values between 0.5 and 0.8 will be considered moderate (48). Additionally, Spearman  
19 correlations between the change in each PF metric and the change in other anchors (e.g.,  
20 physician-reported and patient-reported ECOG PS, patient-reported role function, global health  
21 status/QOL, and HRQOL via the EORTC QLQ-C17; PRO-CTCAE symptomatic adverse event  
22 grades; and FACIT GP5) will be computed. Correlations values of 0.1, 0.3, and 0.5 will be  
23 interpreted as small, moderate, and large (48).  
24  
25  
26  
27  
28  
29  
30  
31  
32  
33  
34  
35  
36  
37  
38  
39  
40  
41

42 The relationship between change in PF metrics and PGI-C and PGI-S items will be  
43 investigated using general linear mixed models. Mean change from baseline with 95%  
44 confidence intervals will be computed for each PF metric based on mixed modeling. Mixed  
45 models will include all PF metrics as outcomes and time as a categorical variable. Additional  
46 patient or design characteristics will be incorporated as baseline covariates. Composite  
47 covariance will initially be used, with the final covariance structure selected based on  
48  
49  
50  
51  
52  
53  
54  
55  
56  
57  
58  
59  
60

1  
2  
3 minimization of the Akaike information criterion. All patients who consent for participation in  
4 this study and complete at least one PF metric will be included in statistical analysis. In the  
5  
6 primary analysis, all observations available will be used.  
7  
8  
9

10 We will conduct secondary analyses, assessing the association between baseline patient  
11 characteristics and baseline PF metrics, using Spearman correlations and longitudinal PF metrics  
12 using statistical modeling. Key baseline patient characteristics that will be explored as feasible  
13 based on the distribution of the characteristics observed in the sample will include cancer cohort  
14 (breast vs. lymphoma); age (<65 vs. ≥65 years); physician-reported ECOG PS; patient-reported  
15 ECOG PS; patient-reported role function, global health status/QOL, and HRQOL via the  
16 EORTC QLQ-C17; PRO-CTCAE symptomatic adverse event grades; and FACIT GP5.  
17  
18

19 Association between longitudinal patient characteristics (patient-reported ECOG PS; patient-  
20 reported role function, global health status/QOL, and HRQOL via the EORTC QLQ-C17; PRO-  
21 CTCAE symptomatic adverse event grades; and FACIT GP5) and longitudinal PF metrics will  
22 be explored using Spearman correlations at successive time points as well as statistical modeling  
23 (bivariate linear mixed modeling).  
24  
25  
26  
27  
28  
29  
30  
31  
32  
33  
34  
35  
36  
37

38 Specific Aim 3: Statistical analysis will be primarily descriptive for the exit questionnaire  
39 data. Free-text responses will be coded for themes by two independent reviewers. Continuous  
40 responses in the exit survey will be summarized using means, standard deviations, medians,  
41 minimums, and maximums. Categorical responses including adjudicated themes from free-text  
42 responses will be summarized using frequencies and relative frequencies.  
43  
44  
45  
46  
47  
48

49 Power considerations: Our targeted sample enrollment is 200 patients, which we expect will  
50 allow the team to have data available for a given PF metric at early post-baseline timepoints (at  
51 least the first 3 months) for at least 170 patients. Based on a prior study evaluating association  
52  
53  
54  
55  
56  
57  
58  
59  
60

1  
2  
3 between PF as measured by the QLQ-C17 and a PGI-C item assessing physical condition (19),  
4 we anticipate 25% of patients to report worsening and the mean change in PF among these  
5 patients to be -8.2 points. The remaining 75% of patients reporting no change or improvement  
6 had a mean change in PF of 0.9 points (pooled standard deviation 15.0). Thus, with a sample  
7 size of 170 patients, this study has 92% power to detect a similar change as the prior study using  
8 a t-test comparison with a two-sided alpha of 0.05. Statistical analysis will employ a modeling  
9 approach across all time points and thus power estimation based on a single time point can be  
10 considered conservative.  
11  
12  
13  
14  
15  
16  
17  
18  
19  
20

21 Missing data: Missing data from patient questionnaires will be handled in a number of ways.  
22 Missing items within a summary or scale score will be handled according to each questionnaire's  
23 published scoring algorithms. When summary or scale score data are missing, baseline  
24 patient/disease characteristics will be compared between patients who do and do not provide data  
25 for a given analysis and patterns of missing data will be graphically explored. All analyses will  
26 first be completed using all available data, then by integrating missing categories for categorical  
27 data and analyses completed using multiple imputation via chained equations (20 or more for  
28 each analysis), and finally using pattern mixture models for longitudinal analyses. Output from  
29 all analyses will be tabulated and descriptively compared to assess the degree to which missing  
30 data impacts study results.  
31  
32  
33  
34  
35  
36  
37  
38  
39  
40  
41  
42  
43

44 For all statistical analyses, p-values  $<0.05$  will be considered statistically significant;  
45 however, interpretation will take into consideration that type I error is not strictly controlled  
46 across all planned analyses. For interpreting the clinical significance of effects, 0.2, 0.5, and 0.8  
47 standard deviation (SD) effects will be considered as small, moderate, and large.  
48  
49  
50  
51  
52

### 53 ***Data Collection and Management***

54  
55  
56  
57  
58  
59  
60

1  
2  
3 The Hugo platform will aggregate data from the EHR, PROs and wearables. At study  
4 enrollment, patients provide Hugo access to their health portals by authenticating themselves  
5 using their username and password. PerfO and clinician-reported ECOG will be among data  
6 collected by the research assistant and entered into a secure REDCap database. Additionally,  
7 clinical co-investigators will review the medical records of each patient directly for more  
8 granular information on tolerability parameters, such as reasons for hospitalizations or dose  
9 reductions, and these data are entered into the study REDCap database by the research assistant.  
10  
11  
12  
13  
14  
15  
16  
17  
18

### 19 ***Patient and Public Involvement***

20  
21 Three patient-advocate co-investigators provided input on the design of the study, the  
22 selection of PRO survey items, and timing of scheduled assessments and the burden on patients.  
23 They also co-created a “study welcome letter” to describe in patient-tailored language the  
24 purpose of the study, and they have participated in the writing and review of this manuscript.  
25 Patient advocates were not involved in the conduct of the study.  
26  
27  
28  
29  
30  
31  
32

### 33 ***Study Limitations***

34  
35 Although patients on this study can receive their breast cancer or lymphoma treatment at  
36 primary or local sites as part of this clinical study, recruitment is limited to patients seen at least  
37 once at Mayo Clinic or Yale clinical sites, limiting participation to patients who have the  
38 physical and financial ability to access these tertiary cancer care centers. Most participants  
39 receive treatment at the primary sites and may not be representative of a larger community  
40 oncology practice. We do not offer patients a smartphone or other web-connected product if  
41 they do not have one, which may limit participation, though smartphone adoption is high at 85%  
42 of American adults, including a majority of those with low income and those living in rural  
43 areas, with minimal gaps by race and ethnicity (49). Some patients who already use a non-Fitbit  
44  
45  
46  
47  
48  
49  
50  
51  
52  
53  
54  
55  
56  
57  
58  
59  
60

1  
2  
3 wearable product or are apprehensive of wearable data collection may decline participation.

4  
5 Lastly, we do not have formalized technology support for patients over and above the research  
6  
7 assistants in this study, which may limit our ability to swiftly address technical issues related to  
8  
9 Hugo or Fitbit.

### 11 12 ***Ethics and Dissemination***

13  
14 Institutional review board (IRB) approval was secured at Mayo Clinic, Yale University,  
15  
16 and the U.S. Food & Drug Administration. Any protocol modifications will be submitted for  
17  
18 IRB approval prior to implementation, and all trial registration details will be updated  
19  
20 accordingly. Study results will be disseminated through publications in general, and specialty  
21  
22 medical journals and conferences.  
23  
24  
25

### 26 ***Study Update***

27  
28 At the time of this publication, all sites have obtained local IRB approval and are enrolling  
29  
30 participants. The COVID-19 pandemic delayed study activation at both sites; enrollment in this  
31  
32 study began in January 2022. 146 participants have been enrolled at the time of this manuscript  
33  
34 submission.  
35  
36  
37  
38  
39

### 40 ***Author Contributions***

41  
42 PGK, GT, CPG, VB, MMJ, MD, MT, JSR, JDR, AB, LJ, BP, ACD, KJR were involved in  
43  
44 conception or design of the work. MD, LF, BNN, JDR, MF, ACD planned for acquisition,  
45  
46 analysis or interpretation of the data. GT, ECR, SH, JP, KJR, SES, CPG were involved in  
47  
48 screening, enrollment and health record review. GT and CPG drafted the work. All authors  
49  
50 critically revised the work for important intellectual content and provided final approval of the  
51  
52 version to be published. GT and CPG agree to be accountable for all aspects of the work in  
53  
54  
55  
56  
57  
58  
59  
60

1  
2  
3 ensuring that questions related to the accuracy or integrity of any part of the work are  
4  
5 appropriately investigated and resolved  
6

### 7 **Funding statement**

8  
9  
10 This work was supported by the Food and Drug Administration (FDA) of the U.S. Department of  
11  
12 Health and Human Services (HHS) as part of a financial assistance award [U01FD005938]  
13  
14 totaling \$2,665,476 with 100 percent funded by FDA]/HHS. The contents are those of the  
15  
16 author(s) and do not necessarily represent the official views of, nor an endorsement, by  
17  
18 FDA/HHS, or the U.S. Government.  
19  
20

### 21 **Competing interests**

22  
23  
24 Dr. Thanarajasingam has received research funding from the from the Food and Drug  
25  
26 Administration for the Yale-Mayo Clinic Center of Excellence in Regulatory Science and  
27  
28 Innovation (CERSI) (U01FD005938) that directly supports this work. She also receives grant  
29  
30 funding from the United States National Cancer Institute (NCI) U01 Tolerability Consortium  
31  
32 (U01CA 2330463), and the Mayo Clinic Center for Clinical and Translational Research (CTSA)  
33  
34 (KL2TR 023794).  
35  
36  
37  
38  
39

40 Dr. Gross has received research funding from the NCCN Foundation (Astra-Zeneca) and  
41  
42 Genentech, as well as funding from Johnson and Johnson to help devise and implement new  
43  
44 approaches to sharing clinical trial data.  
45  
46  
47  
48

49 Over the past three years, Dr. Jeffery reports grant funding from the US Food and Drug  
50  
51 Administration, National Institutes on Drug Abuse, Centers for Disease Control and Prevention,  
52  
53  
54  
55  
56  
57  
58  
59



1  
2  
3 Agency for Healthcare Research and Quality, American Cancer Society, and the National Center  
4  
5 for Advancing Translational Sciences.  
6  
7  
8  
9

10 Dr. Ross currently receives research support through Yale University from Johnson and Johnson  
11  
12 to develop methods of clinical trial data sharing, from the Food and Drug Administration for the  
13  
14 Yale-Mayo Clinic Center of Excellence in Regulatory Science and Innovation (CERSI)  
15  
16 (U01FD005938), from the Medical Devices Innovation Consortium as part of the National  
17  
18 Evaluation System for Health Technology (NEST), from the Agency for Healthcare Research  
19  
20 and Quality (R01HS022882), from the National Heart, Lung and Blood Institute of the National  
21  
22 Institutes of Health (NIH) (R01HS025164, R01HL144644), and from Arnold Ventures for the  
23  
24 Collaboration for Regulatory Rigor, Integrity, and Transparency (CRRIT); in addition, Dr. Ross  
25  
26 is an expert witness at the request of Relator's attorneys, the Greene Law Firm, in a qui tam suit  
27  
28 alleging violations of the False Claims Act and Anti-Kickback Statute against Biogen Inc.  
29  
30  
31  
32  
33  
34

35 Ms. Ritchie currently receives research support through Yale University from Johnson &  
36  
37 Johnson to develop methods of clinical trial data sharing and from the US Food and Drug  
38  
39 Administration for the Yale-Mayo Clinic Center of Excellence in Regulatory Science and  
40  
41 Innovation (CERSI) (U01FD005938).  
42  
43  
44  
45  
46

47 Dr. Huntington has received consulting fees outside of this work from Janssen, Genentech,  
48  
49 AbbVie, Flatiron Health, BeiGene, AstraZeneca, ADC Therapeutics, Epizyme, Merck, Seattle  
50  
51 Genetics, TG Therapeutics, Tyme, Pharmacyclics, SeaGen, and Arvinas.  
52  
53  
54  
55  
56  
57  
58  
59  
60

Over the past three years, Dr. Ruddy reports grant funding from the US Food and Drug Administration, National Institutes of Health, United States Department of Defense, and American Cancer Society.

Dr. Schellhorn has received consulting fees from Eisai, Celgene, SeaGen, and Cardinal Health. She has previously received research funding to her institution from Genetech and Pfizer.

All other authors have no relevant conflicts of interest to disclose.

### Copyright Statement

This is a U.S. Government work. There are no restrictions on its use.

### References

1. Basch E, Campbell A, Hudgens S, et al. Broadening the definition of tolerability in cancer clinical trials to better measure the patient experience (Friends of Cancer Research White Paper) Friends of Cancer Research White Paper, 2018.
2. Kluetz PG, Chingos DT, Basch EM, et al. Patient-Reported Outcomes in Cancer Clinical Trials: Measuring Symptomatic Adverse Events With the National Cancer Institute's Patient-Reported Outcomes Version of the Common Terminology Criteria for Adverse Events (PRO-CTCAE). *Am Soc Clin Oncol Educ Book* 2016;35:67-73. doi: 10.14694/EDBK\_15951410.1200/EDBK\_159514
3. Kluetz PG, Slagle A, Papadopoulos EJ, et al. Focusing on Core Patient-Reported Outcomes in Cancer Clinical Trials: Symptomatic Adverse Events, Physical Function, and Disease-Related Symptoms. *Clinical Cancer Research* 2016;22(7):1553-58. doi: 10.1158/1078-0432.ccr-15-2035
4. Donovan KA, Donovan HS, Cella D, et al. Recommended patient-reported core set of symptoms and quality-of-life domains to measure in ovarian cancer treatment trials. *J Natl Cancer Inst* 2014;106(7) doi: 10.1093/jnci/dju128 [published Online First: 2014/07/10]
5. Oken MM, Creech RH, Tormey DC, et al. Toxicity and response criteria of the Eastern Cooperative Oncology Group. *American Journal of Clinical Oncology* 1982;5(6)
6. FDA-NIH Biomarker Working Group. BEST (Biomarkers, EndpointS, and other Tools) Resource [Internet]. 2016-. [Web page]. Silver Spring (MD) National Institutes of Health (US); [updated January 25, 2021. Glossary]. Available from: <https://www.ncbi.nlm.nih.gov/books/NBK338448/> accessed March 3 2021.
7. Karnofsky D, Burchenal J. Evaluation of Chemotherapeutic Agents. *New York, NY, Columbia University* 1949:19.
8. Simcock R, Wright J. Beyond Performance Status. *Clinical Oncology* 2020;32(9):553-61. doi: <https://doi.org/10.1016/j.clon.2020.06.016>
9. Blagden SP, Charman SC, Sharples LD, et al. Performance status score: do patients and their oncologists agree? *Br J Cancer* 2003;89(6):1022-27. doi: 10.1038/sj.bjc.6601231
10. US Food and Drug Administration (FDA). Guidance for industry: patient-reported outcome measures: use in medical product development to support labeling claims. 2009 [Available from:

- <http://www.fda.gov/downloads/Drugs/GuidanceComplianceRegulatoryInformation/Guidances/UCM193282.pdf>. accessed August 31 2017.
11. Basch E. The Missing Voice of Patients in Drug-Safety Reporting. *New England Journal of Medicine* 2010;362(10):865-69. doi: 10.1056/NEJMp0911494
  12. Moriates C, Shah NT, Arora VM. Flrst, do no (financial) harm. *JAMA* 2013;310(6):577-78. doi: 10.1001/jama.2013.7516
  13. Kluetz PG, Papadopoulos EJ, Johnson LL, et al. Focusing on Core Patient-Reported Outcomes in Cancer Clinical Trials-Response. *Clin Cancer Res* 2016;22(22):5618. doi: 10.1158/1078-0432.CCR-16-2140 [published Online First: 2017/02/06]
  14. US Food and Drug Administration (FDA). Core Patient-Reported Outcomes in Cancer Clinical Trials: Draft Guidance for Industry 2021 [Available from: <https://www.fda.gov/regulatory-information/search-fda-guidance-documents/core-patient-reported-outcomes-cancer-clinical-trials> accessed May 4 2022.
  15. Basch E, Geoghegan C, Coons SJ, et al. Patient-Reported Outcomes in Cancer Drug Development and US Regulatory Review: Perspectives From Industry, the Food and Drug Administration, and the Patient. *JAMA Oncology* 2015;1(3):375-79. doi: 10.1001/jamaoncol.2015.0530
  16. European Organisation for Research and Treatment of Cancer. EORTC Quality of Life Questionnaires [Website]. [Available from: <https://qol.eortc.org/questionnaires/> accessed 1/21/2021 2021.
  17. Health Measures. PROMIS (Patient-Reported Outcomes Measurement Information System) [Available from: <https://www.healthmeasures.net/explore-measurement-systems/promis> accessed 1/21/2021 2021.
  18. Functional Assessment of Chronic Illness Therapy (FACIT). FACIT Measures & Searchable Library [accessed 1/21/2021 2021.
  19. Dueck AC, Mendoza TR, Mitchell SA, et al. Validity and Reliability of the US National Cancer Institute's Patient-Reported Outcomes Version of the Common Terminology Criteria for Adverse Events (PRO-CTCAE). *JAMA Oncol* 2015;1(8):1051-9. doi: 10.1001/jamaoncol.2015.2639
  20. Collins JT, Noble S, Davies HE, et al. Performance status agreement assessed by the patient and clinician in a rapid access lung cancer service: Can either predict completion of treatment? *European Journal of Cancer Care* 2019;28(3):e13004. doi: <https://doi.org/10.1111/ecc.13004>
  21. Martin L, Watanabe S, Fainsinger R, et al. Prognostic Factors in Patients With Advanced Cancer: Use of the Patient-Generated Subjective Global Assessment in Survival Prediction. *Journal of Clinical Oncology* 2010;28(28):4376-83. doi: 10.1200/JCO.2009.27.1916
  22. Bauer J, Capra S, Ferguson M. Use of the scored Patient-Generated Subjective Global Assessment (PG-SGA) as a nutrition assessment tool in patients with cancer. *European Journal of Clinical Nutrition* 2002;56(8):779-85. doi: 10.1038/sj.ejcn.1601412
  23. Abbott J, Teleni L, McKavanagh D, et al. Patient-Generated Subjective Global Assessment Short Form (PG-SGA SF) is a valid screening tool in chemotherapy outpatients. *Supportive Care in Cancer* 2016;24(9):3883-87. doi: 10.1007/s00520-016-3196-0
  24. ECDEU Assessment Manual for Psychopharmacology. Rockville, MD: US Department of Health, Education, and Welfare - Public Health Service - Alcohol, Drug Abuse, and Mental Health Administration.
  25. Peipert JD, Chapman R, Shaunfield S, et al. Do You Recall?: Results From a Within-Person Recall Study of the Patient-Reported Outcomes Measurement Information System (PROMIS) Short Form v2.0 - Physical Function 8c. *Value Health* 2022;25(2):161-66. doi: 10.1016/j.jval.2021.08.011 [published Online First: 20211003]
  26. Hantel A, DuMontier C, Odejide OO, et al. Gait speed, survival, and recommended treatment intensity in older adults with blood cancer requiring treatment. *Cancer* 2020 doi: 10.1002/cncr.33344 [published Online First: 2020/11/26]
  27. Studenski S, Perera S, Patel K, et al. Gait speed and survival in older adults. *JAMA* 2011;305(1):50-8. doi: 10.1001/jama.2010.1923 [published Online First: 2011/01/06]

28. Overcash JA, Rivera HR, Jr. Physical performance evaluation of older cancer patients: a preliminary study. *Crit Rev Oncol Hematol* 2008;68(3):233-41. doi: 10.1016/j.critrevonc.2008.07.001 [published Online First: 2008/09/16]
29. Solway S, Brooks D, Lacasse Y, et al. A Qualitative Systematic Overview of the Measurement Properties of Functional Walk Tests Used in the Cardiorespiratory Domain. *Chest* 2001;119(1):256-70. doi: <https://doi.org/10.1378/chest.119.1.256>
30. Bohannon R. Six-Minute Walk Test: A Meta-Analysis of Data From Apparently Healthy Elders. *Topics in Geriatric Rehabilitation* 2007;23:155-60. doi: 10.1097/01.TGR.0000270184.98402.ef
31. ATS statement: guidelines for the six-minute walk test. *Am J Respir Crit Care Med* 2002;166(1):111-7. doi: 10.1164/ajrccm.166.1.at1102 [published Online First: 2002/07/02]
32. Schmidt K, Vogt L, Thiel C, et al. Validity of the six-minute walk test in cancer patients. *Int J Sports Med* 2013;34(7):631-6. doi: 10.1055/s-0032-1323746 [published Online First: 2013/02/28]
33. Musanti R, Chao Y-Y, Collins K. Fitness and Quality of Life Outcomes of Cancer Survivor Participants in a Community Exercise Program. *Journal of the advanced practitioner in oncology* 2019;10(1):24-37. [published Online First: 01/01]
34. Mikkelsen MK, Berg-Beckhoff G, Frederiksen P, et al. Estimating physical activity and sedentary behaviour in a free-living environment: A comparative study between Fitbit Charge 2 and Actigraph GT3X. *PLoS One* 2020;15(6):e0234426. doi: 10.1371/journal.pone.0234426 [published Online First: 2020/06/12]
35. Lang CE, Barth J, Holleran CL, et al. Implementation of Wearable Sensing Technology for Movement: Pushing Forward into the Routine Physical Rehabilitation Care Field. *Sensors (Basel)* 2020;20(20) doi: 10.3390/s20205744 [published Online First: 2020/10/15]
36. Kelly P, Fitzsimons C, Baker G. Should we reframe how we think about physical activity and sedentary behaviour measurement? Validity and reliability reconsidered. *The International Journal of Behavioral Nutrition and Physical Activity* 2016;13
37. Adans-Dester C, Hankov N, O'Brien A, et al. Enabling precision rehabilitation interventions using wearable sensors and machine learning to track motor recovery. *NPJ Digit Med* 2020;3:121. doi: 10.1038/s41746-020-00328-w [published Online First: 2020/10/08]
38. Hsueh MC, Rutherford R, Chou CC, et al. Objectively assessed physical activity patterns and physical function in community-dwelling older adults: a cross-sectional study in Taiwan. *BMJ Open* 2020;10(8):e034645. doi: 10.1136/bmjopen-2019-034645 [published Online First: 2020/08/18]
39. Jonker LT, Hendriks S, Lahr MM, et al. Postoperative recovery of accelerometer-based physical activity in older cancer patients. *Eur J Surg Oncol* 2020 doi: 10.1016/j.ejso.2020.06.012 [published Online First: 2020/07/20]
40. Kolk D, Aarden JJ, MacNeil-Vroomen JL, et al. Factors Associated with Step Numbers in Acutely Hospitalized Older Adults: The Hospital-Activities of Daily Living Study. *J Am Med Dir Assoc* 2020 doi: 10.1016/j.jamda.2020.06.027 [published Online First: 2020/07/28]
41. Graham SA, Jeste DV, Lee EE, et al. Associations Between Heart Rate Variability Measured With a Wrist-Worn Sensor and Older Adults' Physical Function: Observational Study. *JMIR Mhealth Uhealth* 2019;7(10):e13757. doi: 10.2196/13757 [published Online First: 2019/10/28]
42. Greenberg J, Mace RA, Popok PJ, et al. Psychosocial Correlates of Objective, Performance-Based, and Patient-Reported Physical Function Among Patients with Heterogeneous Chronic Pain. *J Pain Res* 2020;13:2255-65. doi: 10.2147/JPR.S266455 [published Online First: 2020/09/29]
43. Alharbi M, Bauman A, Neubeck L, et al. Validation of Fitbit-Flex as a measure of free-living physical activity in a community-based phase III cardiac rehabilitation population. *Eur J Prev Cardiol* 2016;23(14):1476-85. doi: 10.1177/2047487316634883 [published Online First: 2016/02/26]
44. Brazendale K, Decker L, Hunt ET, et al. Validity and Wearability of Consumer-based Fitness Trackers in Free-living Children. *Int J Exerc Sci* 2019;12(5):471-82. [published Online First: 2019/03/23]

- 1  
2  
3 45. Reddy RK, Pooni R, Zaharieva DP, et al. Accuracy of Wrist-Worn Activity Monitors During  
4 Common Daily Physical Activities and Types of Structured Exercise: Evaluation Study. *JMIR*  
5 *Mhealth Uhealth* 2018;6(12):e10338. doi: 10.2196/10338 [published Online First: 2018/12/12]  
6  
7 46. Jeffery MM, Ahadpour M, Allen S, et al. Acute pain pathways: protocol for a prospective cohort  
8 study. *BMJ Open* 2022;12(7):e058782. doi: 10.1136/bmjopen-2021-058782 [published Online  
9 First: 20220705]  
10  
11 47. Dhruva SS, Ross JS, Akar JG, et al. Aggregating multiple real-world data sources using a patient-  
12 centered health-data-sharing platform. *NPJ Digit Med* 2020;3:60. doi: 10.1038/s41746-020-0265-  
13 z [published Online First: 20200420]  
14  
15 48. Cohen J. *Statistical Power Analysis for the Behavioral Sciences*. Hillsdale, New Jersey: Lawrence  
16 Erlbaum Associates; 1988  
17  
18 49. Pew Research Center. Mobile Technology and Home Broadband 2021 2021 [Available from:  
19 <https://www.pewresearch.org/internet/2021/06/03/mobile-technology-and-home-broadband-2021/>  
20 accessed December 30 2021.

### Figure Legend:

#### Figure 1: In4M Study Schema

### Table Legend:

#### Supplementary Table 1: In4M Schedule of Assessments

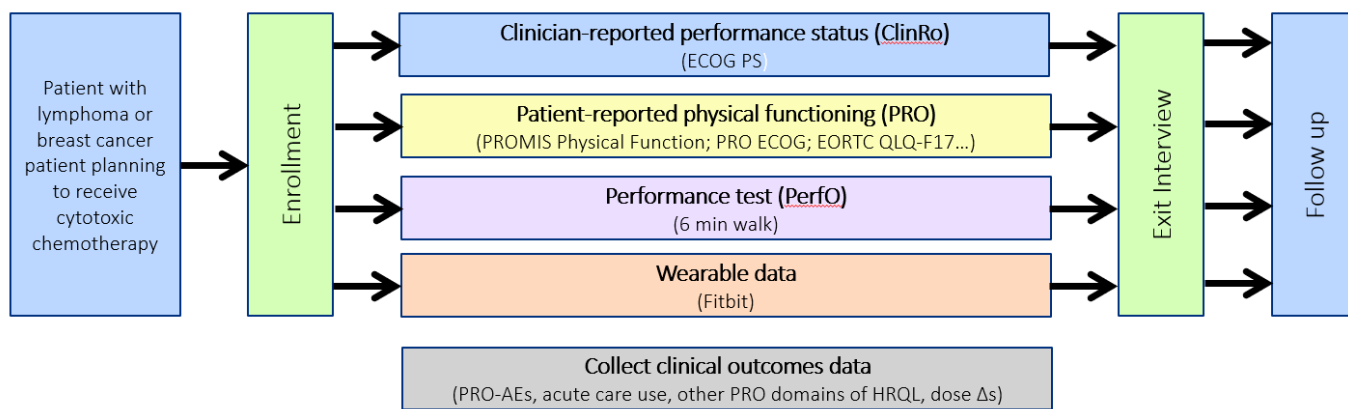

For peer review only

Supplementary Table 1: Schedule of Assessments

|                                  |                   | Standard 2-6 month intravenous chemotherapy treatment; total 9 months study follow up |    |    |    |    |    |    |    |    |    |    |    |    |    |    |
|----------------------------------|-------------------|---------------------------------------------------------------------------------------|----|----|----|----|----|----|----|----|----|----|----|----|----|----|
|                                  | Lead-in           | BL                                                                                    | W2 | W3 | W4 | W5 | W6 | W7 | W8 | M3 | M4 | M5 | M6 | M7 | M8 | M9 |
| Clinician- reported ECOG*        |                   | X                                                                                     |    |    |    |    |    |    |    |    |    |    |    |    |    |    |
| Symptomatic AE (PRO-CTCAE)       |                   | X                                                                                     | X  | X  | X  | X  | X  | X  | X  | X  | X  | X  | X  | X  | X  | X  |
| FACIT Item GP5                   |                   | X                                                                                     | X  | X  | X  | X  | X  | X  | X  | X  | X  | X  | X  | X  | X  | X  |
| PGI-S                            |                   | X                                                                                     | X  | X  | X  | X  | X  | X  | X  | X  | X  | X  | X  | X  | X  | X  |
| PROMIS Physical Function SF 8c   |                   | X                                                                                     | X  | X  | X  | X  | X  | X  | X  | X  | X  | X  | X  | X  | X  | X  |
| EORTC QLQ-F17 Role Function only |                   |                                                                                       | X  |    |    |    | X  |    | X  |    | X  | X  |    | X  | X  |    |
| PRO-ECOG                         |                   | X                                                                                     | X  |    | X  |    | X  |    | X  | X  | X  | X  | X  | X  | X  | X  |
| EORTC QLQ-F17                    |                   | X                                                                                     |    |    | X  |    |    |    |    | X  |    |    | X  |    |    | X  |
| PGI-C                            |                   |                                                                                       | X  | X  | X  | X  | X  | X  | X  | X  | X  | X  | X  | X  | X  | X  |
| 6MWT†                            |                   | X                                                                                     |    |    |    |    |    |    |    | X  |    |    |    |    |    |    |
| Exit Questionnaire               |                   |                                                                                       |    |    |    |    |    |    |    |    |    |    |    |    |    | X  |
| Wearable Data                    | X <sup>‡</sup> -> | Continuous wearable data throughout                                                   |    |    |    |    |    |    |    |    |    |    |    |    |    |    |

BL – baseline, W - week, M – month;

ECOG – Eastern Cooperative Oncology Group

AE – Adverse event

PRO-CTCAE – Patient-Reported Outcomes version of the Common Terminology Criteria for Adverse Events

FACIT Item GP5 – Functional Assessment of Chronic Illness Therapy Item GP5

PGI-S – Patient Global Impression scale of severity

PROMIS Physical Function SF 8c – Patient-Reported Outcomes Measurement Information System Physical Function Short Form 8c

EORTC QLQ-F17 – European Organisation for Research and Treatment of Cancer Quality of Life Form 17

PRO-ECOG – Patient-Reported Outcomes version of the ECOG Performance Status

PGI-C – Patient Global Impression scale change

6MWT – 6-minute walk test

\* at baseline (research assistant to ensure ECOG is recorded at baseline by clinical provider), and where available at follow up

\*\* - context dependent long-term follow-up

† 6MWT at baseline and at M3 will be performed in clinic (with research assistant) for patients treated at primary sites available for assessment. The window for the M3 6MWT assessment is anytime during the 3<sup>rd</sup> month.

‡ Lead-in time period of at least 24 hours prior to initiation of cancer-directed treatment

Highlighted time points are “high yield” time points for reminders and will include research assistant phone calls to patient if Patient-Reported Outcomes have not been completed

## Appendix (Supplementary Material) 1: Inclusion and Exclusion Criteria for the In4M Study

### 1.1.1. Inclusion Criteria

- 1) Age 18 and over;
- 2) English- or Spanish-speaking;
- 3) Pregnant and non-pregnant patients are eligible for participation in this study
- 4) Eligible cancer type and planned intravenous cytotoxic chemotherapy regimen (defined as including 1 or more cytotoxic agents)
- 5) ECOG Performance Score of < 3
- 6) Breast cancer patients
  - a) Patients with any stage breast cancer for whom a new intravenous cytotoxic chemotherapy regimen is planned within the next 8 weeks (patients with local/regional/distant recurrences are allowed; patients with concurrent/prior/future immunotherapy/radiotherapy, targeted therapy, and endocrine therapy for breast cancer are allowed)
- 7) Lymphoma patients
  - a) Lymphoma patients of any histology, stage or line of treatment planned to receive a new intravenous cytotoxic containing chemotherapy regimen (patients planned to receive radiation, maintenance chemotherapy, consolidation stem cell transplant or chimeric antigen receptor T (CAR-T) cell therapy are allowed)
- 8) If patients are receiving the above standard therapies as part of a clinical trial which may include a novel agent or combination, they are also eligible for the present study if the therapeutic protocol permits enrollment in both studies
- 9) Willing and able to give consent and participate in study
- 10) Able to access a mobile smartphone or tablet or computer with web access every day to complete study surveys; able to regularly upload data from the Fitbit to a device in a way that it can be transferred to Hugo.
- 11) Willing and able to perform an in-clinic 6-minute walk test (gait aides are permitted if regularly used by the patient). If a patient is recruited remotely outside of Mayo Clinic Rochester or Yale Smilow Cancer Center New Haven, 6-minute walk test may be omitted.
- 12) Willing to use the health data sharing platform

Potential subjects who do not meet all of the enrollment criteria will not be enrolled. Any deviations from these criteria must be reported in accordance with IRB Policies and Procedures.



### 1.1.2. Exclusion Criteria

- 1) Prior intravenous cytotoxic chemotherapy within 3 weeks prior to study enrollment
- 2) Excluded regimens (due to length of hospitalization required for chemotherapy administration):
  - a) R-CODOX-M/IVAC,
  - b) DA-R-EPOCH (inpatient)
- 3) Excluded histology (due to length of hospitalization and inpatient predominant treatment for required chemotherapy): primary central nervous system lymphoma
  - a) Other regimens with an anticipated high duration of inpatient care time, at PI discretion
- 4) Lack of access to a mobile smartphone or tablet or computer with web access
- 5) Unable or unwilling to upload data from the Fitbit
- 6) Unable or unwilling to use the health data sharing platform
- 7) Unable to give consent and be enrolled

## Appendix (Supplementary Material) 2: Exit Questionnaire

**The In4M Study: Integrating 4 Methods  
to Assess Physical Function in Cancer Patients**

***Questions about your physical function (defined as the ability to carry out day to day activities that require physical effort)***

1. How often did your cancer treatment affected your physical function? If you answer “Never” skip to question 4.

|       |        |              |            |                   |
|-------|--------|--------------|------------|-------------------|
| Never | Rarely | Occasionally | Frequently | Almost constantly |
|-------|--------|--------------|------------|-------------------|

2. How much did your cancer treatment affected your physical function?

|            |              |          |             |           |
|------------|--------------|----------|-------------|-----------|
| Not at all | A little bit | Somewhat | Quite a bit | Very much |
|------------|--------------|----------|-------------|-----------|

3. How do you feel your physical function was affected over the course of your cancer treatment (open-ended)?

---



---

4. Compared to what you expected, how much did your cancer treatment affect your physical function?

- a. Cancer treatment affected my physical function less than I expected
- b. Cancer treatment affected by physical function about the same as I expected
- c. Cancer treatment affected my physical function more than I expected

5. What else would you have wanted to share with us about your physical function during this study that we did not ask (open-ended)?

---



---

***Questions about the surveys you completed during this study***

6. Did you feel that answering the questions asked on the Hugo platform was burdensome?
- a. Yes
  - b. No
  - c. Sometimes

- 1  
2  
3 7. Thinking about the way that your cancer treatments affected you in general, were there  
4 any other questions that you wish we had asked (open-ended)?  
5  
6  
7  
8  
9
- 
- 

- 10  
11 8. During this study, we asked you to choose a response for the statement of: “I am  
12 bothered by side effects of treatment.” The response options ranged from “not at all” to  
13 “very much”. When we asked you this question before you had started cancer  
14 treatment, how did you interpret it when answering? If you cannot recall, make your  
15 best guess.  
16

- 17 a. I answered as though it was asking me if I had any symptoms at that time  
18 b. I answered as though it was asking me about side effects of prior treatments for  
19 other medical conditions  
20 c. The question did not make sense to me since I have not previously received  
21 treatment for this cancer; I skipped the question  
22 d. The question did not make sense to me since I have not previously received  
23 treatment for this cancer; I chose “not at all” as my answer  
24 e. The question did not make sense to me since I have not previously received  
25 treatment for this cancer; I chose another response option besides “not at all” as  
26 my answer  
27 f. Other [please specify]: \_\_\_\_\_  
28  
29  
30  
31  
32  
33  
34  
35  
36
- 
- 

- 37 9. When we asked you to choose a response for the same statement of: “I am bothered by  
38 side effects of treatment.” during your cancer treatment, what factors did you consider  
39 when answering? (Select all that apply; multiple choices are allowed)  
40

- 41 a. The worst side effects I experienced (Severity)  
42 b. The most recent side effects I experienced (Recency)  
43 c. The most frequent side effects I experienced (Frequency)  
44 d. How long the side effects lasted (Duration)  
45 e. Any and all the side effects I had experienced to that point (Totality)  
46 f. Not applicable because I always answered “not at all” to this question  
47 g. Other [please specify]: \_\_\_\_\_  
48  
49  
50  
51  
52  
53  
54  
55  
56  
57  
58  
59  
60
- 
-

**Questions about the wearable device (Fitbit)**

10. Charging of the Fitbit was manageable.

|                   |          |                            |       |                |
|-------------------|----------|----------------------------|-------|----------------|
| Strongly disagree | Disagree | Neither agree nor disagree | Agree | Strongly Agree |
|-------------------|----------|----------------------------|-------|----------------|

11. Fitbit uploads were manageable.

|                   |          |                            |       |                |
|-------------------|----------|----------------------------|-------|----------------|
| Strongly disagree | Disagree | Neither agree nor disagree | Agree | Strongly Agree |
|-------------------|----------|----------------------------|-------|----------------|

12. How often did you check on your Fitbit to track your own activity?

|       |                      |             |                    |                  |                     |
|-------|----------------------|-------------|--------------------|------------------|---------------------|
| Never | Once a month or less | Once a week | A few times a week | About once a day | Several times a day |
|-------|----------------------|-------------|--------------------|------------------|---------------------|

If you chose “Never”, skip to question 14.

13. If you did check on your Fitbit to track your own activity, how much did tracking your activity in real time with a wearable device (the Fitbit) influence your activity level?

|            |              |          |             |
|------------|--------------|----------|-------------|
| Not at all | A little bit | Somewhat | Quite a bit |
|------------|--------------|----------|-------------|

14. Do you think that using the Fitbit to track your activity could help your doctors and nurses to monitor your health and physical function, above and beyond using surveys only that ask about your health and physical function? Why or why not (open ended)?

---



---



---

1  
2  
3  
4  
5 15. Did you feel that the information from your Fitbit was an accurate reflection of your  
6 physical function? Why or why not (open ended)?  
7

8  
9 \_\_\_\_\_  
10  
11 \_\_\_\_\_  
12

13 16. Was there anything about the Fitbit that bothered you during the study?  
14

15  
16 \_\_\_\_\_  
17  
18 \_\_\_\_\_  
19

20  
21 17. Is there anything else you would like to tell us about your participation in this study?  
22

23  
24 \_\_\_\_\_  
25  
26 \_\_\_\_\_  
27  
28  
29  
30  
31  
32  
33  
34  
35  
36  
37  
38  
39  
40  
41  
42  
43  
44  
45  
46  
47  
48  
49  
50  
51  
52  
53  
54  
55  
56  
57  
58  
59  
60
